# Supplementary material
Source: HighWire-hosted journal article supplement (https://bmjopengastro.bmj.com/highwire/filestream/2438/field_highwire_adjunct_files/1/bmjgast-2021-000742supp002_data_supplement.xlsx)
Supplement: bmjgast-2021-000742supp002_data_supplement.xlsx [file bmjgast-2021-000742supp002_data_supplement.xlsx]

## Sheet: Sheet1
id	B	A1	A2	A3	A3B	A4	A5	A6	A7	A8	A9	A10	A11	A12	A13	A14	A15	A16	A17	A18	A19	A20	A20B	B2B	B3	B3B	B4	B4B	C1	C1B	C2	C2B	C3B	C4B	C5B	C6	C7	C8B	C9B	C10B	C13	C14	C14B	D1	D2	D3	D4	D5	D6
1	1	2	8	2		2	2	3	1	5	3	6	2	2	3	7	4	5	4	1	6	women's daily	2	1	none	1	5	5	45	2	female	1	1	1	5	2	4	1	1	2	none	routine	1	5	5	5	5	3	2
2	2	4	4	1		2	1	4	3	6	3	3	3	2	2	4	2	2	2	1	2	B,C,E	3	3	unsure	3	1	1	65	3	male	2	1	1	5	2	4	1	2	1	bloating or gas, heartburn or reflux	possible Barretts	3	3	3	3	3	1	1
3	3	3	3	2		2	2	7	3	8	4	4	3	4	2	4	4	3	3	1	1	D-3, B-12, multivitamin	3	1	none	1	5	5	60	2	female	1	1	3	3	2	1	1	2	2	heartburn or reflux	follow up	1	3	3	3	3	1	1
5	4	5	5	5		2	1	2	2	3	2	3	2	1	2	4	3	2	2	6	4	B12	3	1	none	1	5	5	55	2	female	1	1	1	4	4	2	1	2	1	chronic cough	rule out reflux	2	3	3	3	3	1	1
6	5	2	2	5		1	1	1	2	3	2	4	3	2	1	3	2	2	2	5	4	none	1	1	none	1	5	5	30	1	female	1	1	1	4	0	3	2	2	2	diarrhea	celiac check up	1	3	3	3	3	1	2
9	6	6	8	5		2	2	3	1	6	6	6	1	2	2	3	2	3	2	7	2	multivitamin	2	1	none	1	5	5	85	3	male	2	1	1	5	3	2	1	2	2	none	preventative	1	5	5	5	5	1	1
10	7	4	7	3		1	1	4	6	8	5	6	1	1	1	6	3	5	1	1	6	D-3, multivitamin	3	1	none	1	5	5	65	3	female	1	1	1	5	3	3	2	2	1	none	routine	1	2	3	3	3	1	2
11	8	2	6	2		2	1	4	2	4	2	4	1	2	3	3	2	2	1	1	1	none	1	1	none	1	5	5	70	3	female	1	2	2	2	4	1	1	2	2	heartburn or reflux	follow up after tumor removal	1	3	5	5	5	1	1
12	9	6	6	5		1	1	3	1	7	1	3	1	1	1	6	3	3	1	1	1	C, multivitamin	3	1	none	1	5	5	85	3	female	1	1	1	3	1	2	1	2	2	constipation, diarrhea, disrupted swallowing	routine	1	3	3	3	3	1	1
14	10	7	7		soy	1	1	2	2	7	1	6	1	2	3	6	2	6	2	1	1	multivitamin	2	1	none	1	5	5	60	2	male	2	2	2	2	2	5	2	1	2	none	routine	1	3	3	3	3	1	1
15	11	3	3	3		1	2	6	1	7	6	6	2	2	2	7	3	6	1	1	6	none	1	3	culterelle, align, florastor	2	1	1	75	3	female	1	1	1	5	4	2	1	2	2	diarrhea	follow up	1	1	5	5	2	1	1
16	12	1	1	6		2	2	2	1	4	2	1	2	1	2	4	2	2	2	1	1	calcium, magnesium	3	1	none	1	5	5	65	3	female	1	1	1	5	2	1	2	2	2	heartburn or reflux	bronchoscopy-post lung transplant	1	1	1	1	1	1	1
17	13	3	1	6		1	2	2	1	2	2	1	2	1	2	2	1	2	2	1	1	K, fish oil	3	1	none	1	5	5	60	2	male	2	1	1	4	0	1	2	2	2	bloating or gas	bronchoscopy-post lung transplant	1	1	1	1	2	1	1
18	14	1	8	1		2	1	4	1	6	4	4	2	2	1	7	4	3	3	1	2	multivitamin, fish oil, Areds 2	3	1	none	1	5	5	60	2	female	1	1	1	5	3	2	1	2	2	disrupted swallowing	achalasia	3	3	3	3	3	2	1
21	15	1	6	1		2	2	2	3	2	2	6	2	2	2	2	2	2	2	1	2	none	1	1	none	1	5	5	55	2	male	2	1	1	5	2	4	1	2	2	none	preventative	1	3	3	3	3	1	1
23	16	1	1	6		2	1	2	1	9	1	9	2	2	2	9	2	7	1	1	2	E,C, B-complex	3	1	none	1	5	5	35	1	female	1	2	2	2	0	2	1	2	2	abdominal pain, bloating or gas, bowel incontinence, heartburn or reflux	check on symptoms	2	3	3	3	3	1	1
24	17	1	3	3		3	1	1	1	2	3	3	2	2	2	4	5	1	3	1	4	women's one a day	2	1	none	1	5	5	30	1	female	1	1	1	5	0	2	2	2	2	hematochezia	celiac, intermittent BRBPR	3	5	5	5	5	4	5
25	18	6	6	1		2	2	2	1	3	2	4	2	2	2	6	3	1	3	1	1	centrum silver, magnesium, iron, calcium, D	3	1	none	1	5	5	60	2	male	2	1	3	3	2	2	1	2	1	abdominal pain, bloating or gas	check rejection	3	5	5	5	5	2	1
26	19	4	5	2		2	1	6	1	6	6	6	3	3	2	3	2	6	2	1	6	D	3	1	none	1	5	5	75	3	male	2	1	3	5	3	2	1	1	2	abdominal pain, bloating or gas	stent removal	3	1	1	1	1	4	4
27	20	2	2	2		1	1	1	2	3	1	2	2	2	1	1	1	2	2	1	2	none	1	1	none	1	5	5	35	1	female	1	3	1	4	0	1	2	2	2	heartburn or reflux	check on symptoms	2	1	1	1	1	1	1
28	21	1	6	1		1	1	4	1	6	4	5	1	2	2	6	2	7	1	2	4	multivitamin, D3, calcium	3	1	none	1	5	5	65	3	male	2	1	1	5	2	2	1	2	2	heartburn or reflux	GERD	3	3	3	3	3	1	1
29	22	1	6	3		1	1	3	1	1	1	1	2	2	1	1	2	2	2	2	1	none	1	1	none	1	5	5	65	3	male	2	4	3	4	3	1	1	2	2	bloating or gas	check on symptoms- ongoing monitoring	2	5	5	5	5	1	1
30	23	2	2	2		3	1	4	3	3	3	4	3	3	2	3	3	2	2	1	4	multivitamin, fish oil	3	1	none	1	5	5	20	1	male	2	1	1	3	0	4	2	1	2	abdominal pain, heartburn or reflux	stent removal	3	4	4	4	4	1	1
31	24	4	1	2		2	2	3	6	3	3	3	2	2	2	5	2	2	2	1	5	none	1	2	yakult- probiotic drink	2	4	4	50	2	male	2	1	1	5	1	3	1	2	2	abdominal pain	routine	1	2	3	3	2	1	2
33	25	2	3	5		2	1	3	1	5	2	3	2	2	2	5	3	4	2	2	3	none	1	1	none	1	5	5	20	1	female	1	1	1	4	0	5	2	1	2	bloating or gas	check for ulcers	3	3	4	4	4	3	2
34	26	1	3	1		3	2	5	4	4	2	3	3	3	3	4	5	3	4	1	5	none	1	1	none	1	5	5	30	1	male	2	1	1	5	0	2	2	2	1	abdominal pain	endoscopy to check on symptoms	2	3	3	2	2	1	1
35	27	6	6	3		1	2		6	5	1	4	2	2	2	5	2	2	2	6	1	none	1	1	none	1	5	5	80	3	male	2	1	3	5	2	2	1	2	2	heartburn or reflux, coughing	check on symptoms	2	5	5	3	3	1	1
36	28	1	1	1		2	1	5	1	3	4	3	3	2	2	5	3	4	1	3	1	multivitamin	2	1	none	1	5	5	55	2	male	2	1	1	3	0	1	2	1	2	none	preventative	1	5	5	5	5	2	2
39	29	1	1	6		2	1	1	1	3	1	6	2	3	1	8	1	8	2	1	3	D-Hist, B12, folic acid	3	3	Garden of Life, Ulimate Flora, VSL #3, Klaire Labs	2	4	4	30	1	female	1	1	1	5	0	3	2	2	2	abdominal pain, bloating or gas, constipation, diarrhea	5-yr follow up on polyp	1	1	3	3	2	1	1
42	30	6	6	1		1	1	4	2	7	2	3	2	3	3	4	3		2	1	2	D	3	1	none	1	5	5	65	3	male	2	1	1	3	1	1	1	1	2	none	routine	1	2	2	3	3	1	1
44	31	3	3	3		2		4	2	6	6	6	3	2	2	7	3	3	4	1	4	none	1	1	none	1	5	5	50	2	female	1	1	1	4	3	5	1	1	2	none	routine	1	3	3	3	3	1	1
45	32	4	4		almond	2	2	1	4	5	4	4	1	1	1	6	2	6	1	3	2	magnesium, calcium, multivitamin	3	1	unsure	3	2	2	50	2	female	1	1	1	5	0	2	1	2	1	diarrhea, heartburn or reflux	lung transplant	3	2	3	3	3	2	2
46	33	1	5	5		1	2	1	1	1	6	2	2	2	2	6	6	3	3	1	2	none	1	1	none	1	5	5	55	2	female	1	3	1	2	3	2	1	2	2	none	colonoscopy	1	5	5	5	5	5	5
47	34	3	6	1	& almond	1	3	6	3	4	3	4	6	3	3	3	3	2	2	1	3	multivitamin	2	1	none	1	5	5	70	3	female	1	2	2	2	3	3	2	1	2	rectum pain	routine	1	4	3	1	3	1	1
48	35	2	7	3		2	1	4	1	8	3	5	2	2	2	7	3	3	2	1	3	D, iron, magnesium	3	1	none	1	5	5	65	3	female	1	1	1	5	3	2	1	2	2	abdominal pain, bloating or gas, diarrhea, heartburn or reflux	follow up	1	3	3	3	3	1	1
49	36	1	4		evaporated	1	1	4	3	1	1	1	3	1	1	1	3	1	1	1	1	none	1	2	unsure	3	4	4	65	3	male	2	2	2	1	3	1	2	2	2	none	routine	1	1	1	1	1	1	1
50	37	1	5	2		2	1	3	1	3	2	3	2	2	3	4	2	2	1	1	1	none	1	1	unsure	3	4	4	50	2	female	1	2	2	5	0	1	2	2	2	bloating or gas	preventative	1	2	2	2	2	2	1
52	38	9	6	5		3	2	5	3	6	3	3	3	2	2	3	3	6	3	1	2	none	1	1	none	1	5	5	80	3	male	2	1	1	5	3	2	1	2	2	none	routine	1	3	3	3	3	5	5
53	39	4	1	6		2	2	3	1	2	4	4	2	2	2	5	3	5	3	1	3	none	1	1	none	1	5	5	50	2	male	2	1	3	5	2	4	1	2	2	constipation	routine	1	5	5	5	5	1	1
54	40	2	2	2		2	2	1	1	3	1	3	2	6	2	3	3	1	6	1	1	multivitamin, B, D, fish oil	3	1	none	1	5	5	45	2	male	2	1	1	2	0	2	1	1	2	heartburn or reflux	diverticulitis	3	3	3	3	3	1	1
55	41	7	7	2		4	2	7	7	7	4	6	4	4	4	2	5	6	3	1	1	none	1	2	unsure	3	2,4	6	25	1	male	2	2	2	4	0	1	2	1	2	none	lung transplant	3	3	3	3	3	3	3
56	42	1	6	2		1	1	4	5	5	1	4	1	1	1	8	1	6	1	1	3	D, multivitamin	3	3	hyperbiotics	2	2,4	6	50	2	female	1	1	1	4	2	4	1	1	2	none	polyp removal (early stage cancer)	3	1	1	2	2	1	1
57	43	2	6	2		2	1	4	1	7	1	2	2	1	2	5	1	3	2	1	3	B12, biotin, calcium	3	1	unsure	3	1	1	50	2	female	1	2	2	4	2	3	2	1	2	bloating or gas, constipation, disrupted swallowing, heartburn or reflux	routine	1	1	2	3	2	1	1
58	44	2	2	5		2	1	1	4	5	3	5	3	3	2	4	2	4	3	1	2	none	1	1	none	1	5	5	85	3	male	2	1	1	5	3	2	1	1	2	none	Barretts follow up	3	5	5	5	5	5	5
59	45	4	4	1		1	1	5	3	6	4	5	2	1	3	5	3	5	2	1	5	B12	3	1	none	1	5	5	80	3	male	2	1	1	5	3	2	1	1	2	none			3	3	3	3	3	3
63	46	1	1	6		2	1	1	1	7	3	4	2	2	2	5	3	6	6	6	2	none	1	2	Food 4 Life Womens	2	1,4	6	30	1	female	1	1	1	4	0	1	2	2	2	abdominal pain, bloating or gas, heartburn or reflux	celiac	3	3	3	4	4	1	1
64	47	1	1	6		1	1	2	1	3	1	7	1	3	4	8	2	7	1	1	1	multivitamin, C, omega-3, protein	3	1	none	1	5	5	60	2	female	1	4	3	5	1	1	1	2	2	none	shortness of breath, scarring of lung	3	2	2	2	2	2	2
66	48	1	6	5		2	2	1	2	2	2	1	2	2	1	3	3	3	2	1	1	emergen-C	3	1	none	1	5	5	40	1	male	2	1	3	4	3	5	1	2	2	none	colonoscopy	1	3	3	3	3	3	3
67	49	1	1	6		2	1	7	1	6	1	6	2	1	1	6	2	6	2	6	1	D	3	1	none	1	5	5	65	3	male	2	1	3	5	3	2	1	2	2	none	routine	1	1	1	1	1	1	1
68	50	4	4	5		1	1	6	1	7	1	4	1	1	2	7	2	6	1	1	1	E, florastor	3	1	none	1	5	5	65	3	female	1	1	1	4	0	2	1	2	2	bloating or gas, burping	routine	1	3	3	3	3	1	1
70	51	4	2	2		1	1	3	6	7	2	5	2	2	4	7	3	3	2	1	3	B-complex, D	3	1	none	1	5	5	70	3	male	2	1	1	5	2	2	1	2	2	none	mass in stomach	3	5	3	3	3	1	1
71	52	1	1	6		2	1	1	1	4	1	5	2	1	2	6	1	2	2	1	2	none	1	3	unsure	3	1	1	30	1	male	2	1	1	4	0	1	2	1	2	bloating or gas, diarrhea, heartburn or reflux	bowel frequency		3	3	5	5	3	2
72	53	1	6	1		1	1	4	3	7	2	4	2	1	2	6	3	3	3	1	2	none	1	1	none	1	5	5	30	1	female	1	1	1	4	0	2	2	2	2	abdominal pain, diarrhea	check on symptoms	2	4	5	3	3	1	1
73	54	1	1		cream	1	1	1	1	6	1	9	1	1	6	9	1	7	1	9	1	Calcium, magnesium, biotin, multivitamin	3	1	none	1	5	5	65	3	female	1	1	1	4	0	1	2	2	2	none	routine	1	3	3	3	3	3	3
78	55	3	1	3		1	1	2	1	3	3	3	2	3	2	4	2	1	2	8	2	B12,B1, D, Zinc	3	2	unsure	3	2	2	40	1	female	1	4	3	4	0	2	1	1	2	bloating or gas, constipation, diarrhea, disrupted swallowing, heartburn or reflux	check on symptoms	2	4	4	4	4	5	4
79	56	2	4	1		1	1	3	4	3	3	3	2	3	1	4	3	2	2	4	1	D3	3	1	none	1	5	5	60	2	female	1	2	2	1	4	6	1	1	1	bloating or gas, bowel incontinence, constipation	colonoscopy after having colon cancer	1	5	5	5	5	2	2
80	57	2	6	2		1	2	1	1	7	3	5	2	2	5	7	5	4	2	1	2	B12, D, biotin	3	1	none	1	5	5	65	3	female	1	1	1	5	4	2	1	2	2	none	routine	1	5	5	5	5	1	1
81	58	3	3	2		2	2	7	4	4	1	1	4	3	2	6	3	4	3	1	1	none	1	1	none	1	5	5	60	2	male	2	1	1	2	2	3	2	2	1	heartburn or reflux	unsure	4	3	3	3	3	2	2
83	59	1	6	1		1	1	8	2	6	2	6	1	2	4	7	3	7	1	1	2	D3, calcium	3	3	Align	2	4	4	70	3	female	1	1	1	5	1	2	2	2	2	bloating or gas, disrupted swallowing, heartburn or reflux, "globus" feeling	nausea, belching, "globus"	2	2	3	2	2	1	1
84	60	2	2	5		1	1	3	1	3	1	3	2	1	1	3	2	3	1	2	2	D	3	1	none	1	5	5	50	2	female	1	1	1	5	0	1	2	2	2	bloating or gas	colonoscopy	1	5	5	5	5	2	2
86	61	1	2	2		3	1	3	2	3	2	3	3	3	2	4	3	1	4	1	4	none	1	2	unsure	3	4	4	35	1	male	2	1	1	4	1	3	1	2	2	none	diverticulitis	3	5	5	5	5	3	3
87	62	3	1	6		1	1	4	2	5	1	5	1	1	4	5	2	4	1	6	4	B100, D3, K2, Biotin, Zinc, Niacin	3	3	Kal	2	1,4	6	80	3	male	2	2	2	3	2	3	1	2	2	bloating or gas, heartburn or reflux	check if reflux medication is working	3	1	1	1	1	1	1
90	63	1	6	1		3	2	2	3	1	2	1	3	2	3	1	1	1	1	1	1	none	1	1	none	1	5	5	20	1	male	2	2	2	2	0	5	2	2	2	none	weight loss surgery	3	3	3	3	3	3	1
91	64	4	4	3		2	1	1	6	6	4	1	1	5	2	7	3	2	5	1	7	B12, C, D, multivitamin	3	1	none	1	5	5	60	2	male	2	1	1	5	3	5	1	1	2	none	celiac, family history of cancer	3	3	3	3	3	1	1
92	65	2	2	2		2	2	3	1	7	6	6	2	1	1	6	2	6	2	1	2	C, D, ginger, multivitamin	3	1	unsure	3	1	1	50	2	female	1	1	1	5	2	4	1	1	2	abdominal pain, bloating or gas, constipation	ERCP		1	1	1	1	1	1
93	66	5	5	1		3	2	2	2	2	2	2	4	2	1	2	3	2	4	7	2	none	1	1	none	1	5	5	50	2	male	2	2	2	5	0	2	1	2	2	abdominal pain, bloating or gas, bowel incontinence, heartburn or reflux	polyps and pain	3	1	1	1	1	1	1
94	67	1	1	6		2	2	2	2	5	2	7	2	2	2	7	2	5	2	1	4	fish oil, tumeric, multivitamin	3	1	none	1	5	5	55	2	male	2	1	1	4	2	4	1	1	1	none	endoscopy	1	3	3	3	3	1	1
95	68	1	1	6		1	1	5	8	9	2	7	2	7	2	9	3	2	2	1	2	CQ10, D2, Milk thistle, biotin, magnesium	3	1	VSL3	2	1	1	55	2	female	1	1	1	5	0	2	2	2	2	abdominal pain, bloating or gas, bowel incontinence, constipation, diarrhea, heartburn or reflux	colonoscopy, endoscopy		3	3	3	3	1	1
96	69	2	6	1		1	1	6	2	4	2	2	2	2	2	7	2	1	1	2	1	none	1	3	unsure	3	1	1	25	1	male	2	1	1	2	2	4	1	2	2	heartburn or reflux	reflux	2	2	3	1	1	1	1
99	70	2	3	5		2	2	3	3	8	3	3	2	1	2	6	3	3	4	2	1	D	3	1	none	1	5	5	45	2	female	1	1	3	4	3	5	1	2	2	blood in stool	blood in stool	3	3	3	3	2	1	1
100	71	1	2	1		5		1	3	4	1	4	2	2	1	3	4	1	1	5	2	D, E, tumeric, folic acid, dhea	3	2	unsure	3	4	4	55	2	male	2	1	1	4	2	3	1	1	2	heartburn or reflux	Barretts	3	2	3	4	3	1	1
101	72	6	1	6		2	2	4	7	4	3	4	3	2	2	4	4	5	2	1	3	calcium, multivitamin	3	1	none	1	5	5	65	3	male	2	1	1	5	3	3	1	2	2	high lipase levels	periodic check of pancreas	1	4	4	4	4	1	1
102	73	2	3	1		4	2	4	2	6	2	5	4	2	5	7	3	4	3	1	4	none	1	1	none	1	5	5	40	1	female	1	2	2	5	1	3	2	2	2	abdominal pain, heartburn or reflux	symptoms	2	5	5	5	4	2	2
103	74	2	4	2		5	2	4	2	4	2	4	3	3	5	5	4	2	2	5	2	none	1	1	none	1	5	5			female	1	2	2	3	2	4	1	2	2	abdominal pain, bloating or gas, constipation, heartburn or reflux	pancreatic cyst	3	3	3	3	3	5	5
104	75	1	1	6		3	2	3	2	3	2	2	2	2	2	4	3	5	1	1	1	B complex, C, D, VM-75 multivitamin	3	2	vitamin shoppe 13 billion organisms	2	1,4	6	70	3	male	2	1	1	5	2	2	1	2	2	bloating or gas, diarrhea, heartburn or reflux	symptoms	2	3	3	3	3	3	3
105	76	2	2	2	lactaid	2	2	3	2	6	2	4	2	3	3	4	2	6	2	1	2	none	1	1	none	1	5	5	70	3	female	1	1	1	5	7	5	1	2	2	diarrhea, heartburn or reflux	follow up colonoscopy to check if polyp tissue was removed	1	3	3	3	3	5	5
107	77	6	8	1		1	1	1	2	6	3	3	1	1	2	3	3	6	4	1	3	none	1	1	none	1	5	5	70	3	male	2	1	1	4	2	1	2	2	2	none	cyst in pancreas	3	5	5	5	5	1	2
108	78	1	8	2		1	1	2	6	6	2	2	1	4	2	7	3	2	1	9	1	none	1	1	none	1	5	5	80	3	female	1	1	1	5	3	1	2	2	2	none	colonoscopy	1	3	3	3	3	2	1
109	79	6	1	3		1	1	2	1	8	1	6	1	1	1	7	3	3	1	1	2	D, B12	3	1	none	1	5	5	60	2	male	2	1	1	5	2	3	1	2	2	none	colonoscopy	1	5	5	5	5	1	2
110	80	3	4	3		2	2	3	1	5	3	4	2	2	4	5	3	2	2	6	2	B12, D	3	1	none	1	5	5	65	3	female	1	2	2	3	2	2	2	1	2	bloating or gas, constipation	colonoscopy	1	3	2	2	2	1	1
111	81	1	1	6		1	1	2	1	2	1	4	1	1	2	7	1	5	1	1	2	B12, B6, D3, kelp, magnesium, fish oil	3	2	unsure	3	3,4	6	55	2	male	2	1	1	2	3	4	1	2	2	none	colonoscopy	1	2	1	1	1	1	1
112	82	4	4	5		4	2	5	1	4	3	3	2	2	2	4	5	2	3	1	1	calcium citrate	3	1	none	1	5	5	35	1	male	2	1	1	5	3	5	1	1	1	abdominal pain, bloating or gas, diarrhea	pancreas tumor biopsy	3	1	1	1	1	1	1
113	83	2	2	2		1	1	4	2	4	2	4	2	1	1	2	3	6	1	1	1	none	1	1	none	1	5	5	40	1	male	2	1	1	5	1	3	1	2	2	bloating or gas, diarrhea, heartburn or reflux	acid reflux	2	3	4	4	4	1	1
114	84	6	6	3		3	2	6	6	7	2	3	3	2	3	4	4	3	3	1	1	none	1	1	none	1	5	5	75	3	male	2	1	1	5	4	2	1	2	2	heartburn or reflux	Barretts	3	3	3	3	3	4	5
116	85	1	6	1		2	1	2	1	8	4	8	2	1	2	8	3	7	2	1	1	B12, folic acid, omega-3, ginkgo	3	1	unsure	3	1	1	60	2	female	1	1	1	5	0	2	1	2	1	bloating or gas, diarrhea	routine	1	3	3	3	3	1	1
117	86	2	7	2		1	2	3	6	4	3	6	2	3	2	6	3	3	2	1	1	none	1	1	none	1	5	5	65	3	male	2	1	3	5	2	2	1	1	2	none	lung transplant follow up	3	5	5	5	5	2	2
119	87	2	6	1		3	1	6	1	6	3	6	2	2	2	6	2	2	1	6	1	calcium, iron, magnesium	3	3	none	1	1	1	50	2	female	1	1	3	4	1	4	1	1	2	none			2	1	1	1	1	1
120	88	4	1	6		1	1	4	2	8	1	7	2	3	2	7	3	6	3	1	1	centrum, graviola	3	1	none	1	5	5	50	2	male	2	1	1	3	2	4	1	2	2	heartburn or reflux	biopsy	3	3	3	2	1	1	1
121	89	1	1	6		2	2	3	1	4	2	4	3	2	2	5	3	3	3	4	2	D, B12, iron	3	1	none	1	5	5	35	1	female	1	2	2	5	1	3	1	1	2	abdominal pain, bloating or gas, bowel incontinence, constipation, heartburn or reflux			5	4	5	5	5	5
123	90	6	7	3		1	1	4	1	9	2	6	2	2	2	7	2	6	2	1	3	none	1	1	none	1	5	5			female	1	1	1	5	2	4	1	1	2	bloating or gas, heartburn or reflux	routine- family history of colon cancer	1	5	5	5	5	1	1
124	91	4	6	3		2	2	7	1	6	4	3	3	2	2	6	3	2	3	1	2	D3, DHEA, COQ10, Lovaza, tumeric, multivitamin	3	1	unsure	3	1,4	6	75	3	female	1	1	3	2	3	2	1	2	2	bloating or gas, constipation, diarrhea, heartburn or reflux	Barretts	3	4	4	5	3	1	2
125	92	4	4	3		2	1	3	2	6	3	4	2	2	2	6	3	1	3	1	1	iron, magnesium, calcium, multivitamin	3	1	none	1	5	5	55	2	male	2	1	1	4	1	1	2	2	2	none	post lung transplant bronchoscopy	3	5	5	5	5	1	1
126	93	4	5	5	lactaid	1	1	1	3	8	1	4	2	2	1	7	3	5	2	1	1	multivitamin with iron and D3	2	1	none	1	5	5	25	1	male	2	1	1	5	0	3	2	2	1	nauseous	celiac- endoscopy	3	3	3	3	3	1	1
127	94	1	1	6		5	2	1	2	3	3	1	2	2	1	5	4	3	2	6	1	D	3	3	unsure	3	4	4	50	2	male	2	1	1	4	3	5	1	2	2	short bowel syndrome	routine	1	1	2	2	2	1	1
128	95	1	1	6		2	1	2	1	7	2	4	1	1	1	6	1	3	1	1	2	CBD	3	1	unsure	3	3	3	70	3	male	2	1	1	5	0	2	1	1	2	bloating or gas, heartburn or reflux	adenocarcinoma of esophagus	3	3	3	3	4	5	1
130	96	4	4	5		2	2	5	4	4	2	3	2	2	2	5	2	5	3	7	5	multivitamin	2	3	Omega 3, acidophilus, digestive	2	1,2,4	6	65	3	male	2	1	1	4	0	1	2	2	2	abdominal pain, bloating or gas, bowel incontinence, constipation, heartburn or reflux, diverticulitis	Barretts	3	1	1	1	1	1	1
131	97	1	5	2		2	1	2	1	2	2	2	2	2	4	2	4	1	2	5	3	B12, D, calcium, multivitamin	3	1	none	1	5	5	25	1	female	1	2	2	4	0	13	2	2	2		endoscopy	1	3	3	2	1	2	2
132	98	1	1	6		1	1	2	1	2	1	3	3	2	4	4	4	2	5	1	1	iron, multivitamin	3	1	none	1	5	5	25	1	male	2	1	1	5	0	2	2	2	2	abdominal pain, constipation	colonoscopy	1	3	3	3	3	2	2
133	99	1	5	2		4	2	6	4	5	1	2	3	2	2	4	2	2	2	3	2	none	1	1	none	1	5	5	55	2	female	1	2	2	2	3	2	2	1	2	none	weight loss	3	1	1	1	1	1	1
134	100	6	6	2		1	2	3	2	6	2	6	2	2	1	4	2	1	1	6	1	D	3	1	none	1	5	5	65	2	male	2	1	3	3	2	2	1	1	2	none	follow up	1	5	5	5	5	2	2
135	101	3	3	1		4	1	1	2	3	3	3	2	2	2	3	4	1	1	1	1	none	1	3		2	1	1	25	1	male	2	2	2	3	0	1	2	2	2	abdominal pain, bloating or gas, bowel incontinence, constipation, diarrhea, heartburn or reflux, fecal incontinence	symptoms	2	3	2	5	3	2	3
136	102	1	1	6		1	1	4	4	6	1	4	2	2	3	4	2	1	1	1	1	none	1	1	none	1	5	5	50	2	female	1	2	2	5	3	3	2	2	2	none	bronchoscopy	1	3	3	3	3	2	2
137	103	1	4	1		1	2	4	1	4	1	3	2	1	2	3	3	4	1	1	3	iron	3	1	none	1	5	5	60	2	male	2	4	3	4	3	3	1	2	2	none	lymph nodes	3	5	5	5	5	1	1
138	104	2	2	2		2	3	7	8	7	3	8	3	3	3	6	3	3	2	1	1	centrum	2	1	none	1	5	5	35	1	male	2	1	1	4	0	3	2	2	2	none	colonoscopy- family history	1	5	5	5	5	1	1
139	105	5	8	1		2	2	5	6	8	2	2	2	2	2	3	4	4	3	1	1	ADEK	2	1	none	1	5	5	40	1	female	1	1	3	5	3	5	1	2	2	none	pre-transplant routine	1	3	3	3	3	2	2
141	107	3	3	2		2	2	2	5	6	2	4	2	2	2	3	3	3	2	1	2	D, B	3	1	none	1	5	5	50	2	female	1	1	2	5	0	3	2	1	2	abdominal pain, bloating or gas, bowel incontinence, diarrhea, heartburn or reflux	above reasons and vomiting	2	3	3	3	3	1	1
142	108	1	1	1		4	2	1	4	2	3	2	2	1	1	4	2	1	2	1	2	multivitamin, omega, iron, B12	3	1	none	1	5	5	50	2	female	1	1	3	2	1	1	2	2	2	none	for bariatric procedure	3	5	5	5	5	1	1
143	109	3	1	6		2	2	2	2	3	2	2	2	2	2	2	1	2	2	6	3	none	1	1	none	1	5	5	50	2	male	2	1	2	5	4	6	1	1	2	heartburn or reflux	Barretts Esophagus	3	3	3	3	3	2	2
144	110	2	2	5		2	2	5	2	5	2	4	2	3	2	5	2	3	3	2	3	none	1	1	none	1	5	5	65	3	female	1	1	1	5	2	1	2	2	2	heartburn or reflux	screening	1	3	3	3	3	2	1
145	111	4	3	3		2	2	3	2	4	3	4	2	2	2	4	2	3	2	1	4	B12	3	1	none	1	5	5	60	2	male	2	3	1	1	0	3	2	1	2	none	unsure	4	3	3	2	3	2	3
146	112	4	7	5		2	1	3	1	3	1	4	2	2	1	4	3	4	3	1	1	none	1	3	unsure	3	4	4	65	3	male	2	1	1	3	2	2	2	2	2	none	low P.F.T.'s	3	5	3	3	4	3	3
150	113	1	1	6		2	2	3	4	7	3	4	3	3	2	5	3	3	3	1	1	E, D, B12, calcium	3	1	none	1	5	5	70	3	male	2	1	1	1	4	2	1	2	2	diarrhea	bronchoscopy	3	5	5	5	5	2	2
151	114	1	1	6		2	2	1	1	1	2	2	2	1	2	2	2	2	1	1	2	none	1	2	unsure	3	1	1	60	3	male	2	1	3	4	1	2	1	1	2	disrupted swallowing	Barretts and swallowing problems	3	4	4	5	5	2	1
152	115	1	2	1		2	2	1	2	3	1	3	2	2	1	4	2	3	1	4	1	none	1	1	none	1	5	5	45	2	male	2	1	1	3	0	1	1	1	2	abdominal pain, bloating or gas, diarrhea, heartburn or reflux	unknown problem	2	5	5	5	5	1	1
153	116	2	2	2		2	2	2	2	2	2	2	3	2	2	2	3	2	3	3	2	none	1	1	unsure	3	4	4	35	2	female	1	2	2	5	2	4	2	2	2	none	gastric sleeve procedure	3	4	4	1	4	1	1
154	117	3	6	3		2	2	4	1	1	1	1	2	2	2	2	2	3	2	6	1	none	1	1	none	1	5	5	70	3	male	2	4	3	4	3	2	1	2	2	none	post-op lung tx	3	3	3	3	3	3	3
155	118	3	8	2		1	1	6	6	7	1	9	1	3	5	5	3	9	1	1	1	none	1	1	none	1	5	5	65	3	female	1	2	2	1	3	5	2	2	2	none	for a colonoscopy	1	1	1	1	1	1	1
156	119	3	1	6		1	1	3	1	7	1	4	3	2	2	4	2	2	2	1	2	C, D, E	3	1	none	1	5	5	75	3	male	2	1	3	5	0	2	1	2	1	disrupted swallowing	Schatski's ring	3	5	5	5	5	3	3
157	120	8	6	5		1	1	5	6	7	6	6	1	1	1	6	5	5	2	1	6	multivitamin	2	1	none	1	5	5	70	3	male	2	1	1	5	2	1	1	1	1	none	routine	1	5	5	5	5	2	1
158	121	2	7	2		1	1	6	6	6	1	6	1	6	3	7	3	1	1	1	1	B12, D, calcium	3	1	none	1	5	5	70	3	male	2	2	2	2	4	6	1	2	2	none	brochoscopy because I had right lung transplant	3	3	3	3	3	3	3
159	122	1	1	3		1	1	2	2	9	2	4	1	2	1	1	2	2	1	1	2	none	1	1	none	1	5	5	50	2	male	2	2	2	1	3	3	1	2	2	none	unsure	4	3	3	3	3	4	1
160	123	1	1	2		4	3	1	4	3	2	3	3	2	1	4	1	4	2	1	4	none	1	1	none	1	5	5	50	2	male	2	2	2	5	1	4	2	2	2	abdominal pain	age	1	5	5	5	5	4	2
161	124	1	6	2		2	1	3	1	7	6	6	1	1	1	6	2	4	1	1	4	none	1	1	none	1	5	5	70	3	female	1	1	3	5	0	2	2	1	2	heartburn or reflux	check up	1	4	4	2	2	1	1
164	125	6	6	3		1	1	2	6	6	2	6	2	3	1	2	3	2	1	1	2	prenatal	3	1	none	1	5	5	55	2	male	2	1	3	2	3	4	1	2	2	none	check up	1	4	4	5	5	4	4
165	126	3	3	5		1	1	3	1	8	1	6	1	1	1	8	2	7	1	1	3	multivitamin, C, D, fish oil, biotin	3	1	none	1	5	5	65	3	female	1	1	1	5	0	2	2	2	2	none	screening	1	5	5	5	5	1	1
166	127	1	6	2		2	1	2	2	6	1	1	2	2	2	7	3	7	2	1	1	none	1	1	none	1	5	5	55	2	male	2	1	1	5	1	6	1	2	2	none	check up	1	3	3	3	3	3	3
167	128	1	4	2		1	1	3	1	7	6	4	2	1	1	3	3	6	2	1	4	none	1	1	none	1	5	5	80	3	female	1	1	3	5	0	1	2	2	2	abdominal pain, constipation	doctor ordered it	4	3	3	3	3	1	1
168	129	4	4	3		1	1	1	1	6	2	2	2	2	1	4	2	4	1	1	6	omega, COQ10	1	1	none	1	5	5	80	3	female	1	1	3	5	0	1	2	2	2	none	blood in stool	2	5	5	5	5	5	5
169	130	3	5	6		2	1	4	5	5	2	4	2	2	2	5	4	4	4	1	1	multivitamin	2	1	none	1	5	5	55	2	male	2	2	2	4	2	3	1	1	2	none	routine screening	1	3	3	3	2	1	1
170	131	1	2	2		2	2	5	1	5	4	3	1	2	2	3	4	4	2	1	1	none	1	1	none	1	5	5	70	3	female	1	4	3	5	1	2	1	2	2	heartburn or reflux	screening after 10 years	1	3	3	3	3	2	3
171	132	3	7	1		5	3	2	4	4	4	3	3	4	3	3	3	2	3	1	2	none	1	1	none	1	5	5	50	2	female	1	2	2	4	0	3	1	2	2	bloating or gas	polyps	3	3	3	3	3	2	2
172	133	2	2	5		2	2	4	2	3	3	4	2	2	4	4	2	3	2	1	4	none	1	1	none	1	4	4	65	3	male	2	1	1	4	2	0	2	1	2	none	polyp removal	3	3	3	2	2	2	2
173	134	2	7	2		3	1	2	2	8	1	3	2	1	1	7	2	3	3	1	2	centrum silver, calcium, C	3	1	none	1	5	5	70	3	female	1	1	3	5	0	2	2	2	1	none	part of an experimental therapy trial for pancreatic cancer	3	5	5	5	5	1	1
174	135	4	4	2		1	1	2	6	6	1	1	1	2	1	6	2	1	1	1	1	multivitamin, B12	3	1	none	1	5	5	75	3	male	2	1	1	2	1	2	1	2	2	none	check-up	1	3	3	3	3	2	2
175	136	1	7	2		2	2	3	1	8	2	5	2	2	1	6	2	5	2	1	2	multivitamin	2	1	none	1	5	5	60	2	male	2	1	1	5	3	2	1	1	2	none	IPMN/annual	3	5	5	5	5	1	1
176	137	4	4	2		1	1	3	5	4	2	2	2	2	2	5	2	1	3	1	1	none	1	1	none	1	1	1	50	2	male	2	1	2	4	0	1	2	2	2	heartburn or reflux	reflux	2	1	1	1	2	1	1
177	138	1	1	6		1	1	2	6	6	1	2	2	2	1	2	3	1	2	1	1	C, D	3	1	none	1	5	5	60	2	female	1	4	3	4	0	1	2	2	2	bloating or gas	bronchoscopy for lymph node bx	3	3	3	3	3	1	1
178	139	1	2	5		1	2	2	5	6	5	4	2	2	1	4	1	2	2	4	1	D	3	1	none	1	5	5	65	3	female	1	1	3	5	2	2	1	2	2	heartburn or reflux	lung issue	3	3	3	3	3	1	1
179	140	2	3	2		2	2	2	1	4	2	4	2	2	1	4	3	3	3	7	2	none	1	1	none	1	5	5	75	3	female	1	1	1	5	2	1	1	2	2	none	anemic	3	5	5	5	5	3	3
180	141	3	3	1		2	2	4	2	7	2	1	2	3	2	5	3	5	2	1	1	multivitamin, magnesium, iron	3	1	none	1	5	5	65	3	male	2	1	3	3	4	3	2	1	2	none	follow up after lung transplant	1	3	3	3	3	2	2
181	142	3	3	5		2	2	4	2	4	2	4	2	2	2	4	2	2	2	1	1	none	1	1	none	1	5	5	50	2	male	2	1	1	5	2	4	1	2	1	heartburn or reflux	post poem endoscopy	3	3	3	3	3	5	2
182	143	1	2	3		2	1	1	1	7	1	4	1	1	1	8	2	6	1	1	2	multivitamin, magnesium	3	1	none	1	5	5	45	2	female	1	1	1	5	3	5	1	2	2	abdominal pain, bloating or gas, dirupted swallowing, heartburn or reflux	GERD, stricture	2	5	5	5	5	2	2
183	144	4	9	1		1	1	4	8	3	4	3	2	3	3	3	2	6	2	6	1	none	1	2	unsure	3	4	4	50	2	female	1	2	2	1	4	4	2	1	2	constipation, heartburn or reflux	unsure	4	3	3	3	3	1	1
185	145	4	1	6		1	1	5	2	6	2	2	2	3	1	7	4	4	3	1	2	none	1	1	none	1	5	5	70	3	female	1	4	1	2	2	2	2	2	2	none	confirm the location of a mass near the stomach and pancreas	3	3	3	3	3	1	1
186	146	2	1	6		1	1	2	1	7	1	3	1	1	2	6	1	4	1	1	1	D	3	1	none	1	5	5	75	3	female	1	1	1	5	2	1	2	2	2	abdominal pain, bloating or gas, diarrhea, heartburn or reflux	abdominal pain	2	3	3	3	3	1	1
187	147	3	6	5		2	2	4	2	4	4	4	2	3	2	4	2	1	2	6	3	multivitamin, citracal, D, B12	3	1	none	1	5	5	60	2	male	2	1	1	1	2	2	1	2	2	constipation, diarrhea, heartburn or reflux	unsure	4	3	3	3	3	1	2
188	148	1	7	1		1	1	3	1	7	1	4	1	1	2	7	3	4	1	7	6	D	3	1	acidophilus	2	4	4	65	3	female	1	1	3	5	0	1	2	2	1	heartburn or reflux	FUN-really wanted liposuction but this was next best thing	3	5	5	5	5	2	2
189	149	3	3	1		2	2	3	1	2	2	4	3	2	2	5	3	5	3	5	7	none	1	1	none	1	5	5	80	3	male	2	1	1	4	0	2	1	2	2	none	follow up for Barrett's esophagus	1	3	3	3	3	3	2
190	150	2	2	5		3	2	7	7	6	4	4	4	3	2	5	4	2	3	1	1	none	1	2	unsure	3	4	4	70	3	male	2	1	1	2	4	2	1	1	2	none	check lung	3	3	3	4	3	3	3
191	151	3	5	1		2	2	1	3	6	5	4	3	2	1	4	3	3	3	1	2	B complex, D	3	1	none	1	5	5	40	1	female	1	2	2	3	2	4	2	2	1	bloating or gas, heartburn or reflux	gastric bypass screening	1	3	3	3	3	2	2
192	152	4	6	5		1	2	2	2	8	5	6	2	2	2	7	5	2	3	1	1	D	3	1	none	1	5	5	75	3	female	1	1	1	4	3	2	1	2	2	none	pancreatic cyst	3	3	3	3	3	3	3
193	153	3	3	2		1	1	4	3	4	2	3	3	3	4	3	3	3	3	1	1	B12 shots		1	none	1	5	5	35	1	female	1	2	2	4	1	2	2	2	2	bloating or gas, constipation, diarrhea	crohn's disease follow up	1	3	3	3	3	1	1
196	154	1	1	6		4	1	3	2	3	3	4	4	4	2	7	3	2	3	6	4	mulltivitamin, iron zinc, fish oil	3	1	none	1	5	5	50	2	female	1	3	1	4	0	2	2	2	2	heartburn or reflux	prep for bariatric surgery	1	5	5	3	3	1	1
197	155	1	2	1		2	2	3	9	3	3	4	2	4	3	3	3	2	3	2	3	none	1	1	none	1	5	5	50	2	male	2	2	2	2	1	5	1	2	2	diarrhea	surgery prep	1	2	1	1	1	2	1
198	156	2	6	2		1	2	2	1	4	1	2	2	3	2	4	2	1	1	1	2	none	1	1	none	1	5	5	80	3	female	1	4	3	1	2	5	1	2	2	none	screening	1	5	5	5	5	2	2
199	157	2	1	6		2	1	2	1	7	6	5	1	2	2	7	2	6	2	1	1	D, C, B, omega369	3	1	unsure	3	4	4	70	3	female	1	1	1	4	2	0	1	2	2	none	cysts on pancreas	3	1	1	3	1	1	1
201	158	2	2	2		2	2	4	2	4	6	6	4	2	2	6	3	3	5	1	2	multivitamin	2	1	none	1	5	5	75	3	male	2	1	1	5	4	0	1	2	2	none	checking for cancer	3	5	5	5	5	1	1
202	159	2	7	3		1	1	6	6	8	1	4	2	3	3	5	3	4	2	1	3	none	1	1	none	1	5	5	65	3	female	1	1	1	5	2	3	1	2	2	bowel incontinence, diarrhea	follow up celiac	1	3	3	3	3	1	1
205	160	6	1	6		7	1	6	1	3	2	3	1	2	2	2	2	3	2	1	2	none	1	1	none	1	5	5	50	2	female	1	2	2	5	3	6	2	2	2	bloating or gas, constipation	gastric bypass clearance	1	3	3	3	3	1	1
206	161	2	1	6		1	1	2	1	7	1	6	1	1	1	7	1	6	1	1	2	B6, calcium, D3	3	1	unsure	3	4	4	65	3	female	1	1	1	5	0	2	1	2	2	none	follow up	1	2	2	5	2	1	1
207	162	1	1	6		1	1	6	1	7	4	4	2	5	2	7	3	2	5	1	4	none	1	1	none	1	5	5	60	2	female	1	1	1	5	2	4	1	2	1	none	routine screening	1	5	3	3	3	1	1
208	163	2	2	5		2	1	2	1	6	4	4	3	3	2	6	3	4	4	3	3	none	1	1	none	1	5	5	20	1	female	1	1	3	4	0	5	2	2	2	bloating or gas	gluten sensitivity	3	3	3	2	2	2	2
209	164	6	1	6		2	1	3	2	6	4	6	1	2	1	7	3	4	2	1	1	none	1	1	none	1	5	5	80	3	female	1	1	1	4	2	1	2	2	2	constipation, heartburn or reflux	routine	1	5	5	5	5	1	1
210	165	2	5	2		1	2	4	2	4	1	2	2	4	2	2	2	2	1	1	1	none	1	1	none	1	5	5	65	3	female	1	2	2	1	3	3	1	2	1	none	stent	3	3	3	3	3	3	3
211	166	1	2	1		2	2	1	2	3	2	3	2	3	3	3	1	3	2	2	2	C	3	1	none	1	5	5	20	1	female	1	1	1	4	0	2	2	2	2	none	celiac disease	1	3	3	3	3	1	1
212	167	2	8	1		2	1	2	2	2	2	2	1	2	2	2	2	1	1	1	1	prenatal	3	1	none	1	5	5	60	2	male	2	2	2	2	3	3	1	2	2	none	pre-op lung transplant screening	1	3	3	3	3	1	1
213	168	1	1	6		2	1	5	4	4	5	5	2	2	2	6	4	3	2	1	2	none	1	1	none	1	5	5	70	3	female	1	1	1	5	0	2	2	2	1	abdominal pain, bloating or gas, diarrhea	10 year screening, diverticuli, diarrhea	2	5	3	3	3	2	2
215	169	1	7	5		2	2	2	1	7	3	5	1	2	2	7	2	2	2	1	2	potassium, magnesium, D3	3	3	Align	2	4	4	80	3	female	1	1	1	5	3	3	1	1	2	bloating or gas, diarrhea, disrupted swallowing, heartburn or reflux	reflux	2	2	5	5	2	1	1
216	170	2	6	1		3	1	3	1	3	2	3	2	2	2	4	2	3	1	1	1	multivitamin, D	3	1	none	1	5	5	65	3	female	1	3	1	3	0	1	2	2	2	none	routine follow-up	1	5	5	5	5	2	2
217	171	3	3	1		2	2	4	4	3	3	3	2	3	2	3	4	3	2	1	1	none	1	1	none	1	1	1	55	2	male	2	4	3	3	0	1	2	1	1	none	intraepithelial neoplasia	3	3	2	1	3	1	1
218	172	1	1	6		2	1	2	4	1	2	2	2	2	1	3	2	1	2	1	1	none	1	1	none	1	5	5	60	2	female	1	1	3	1	1	2	2	2	1	abdominal pain, bloating or gas, constipation	check my pancreas	3	1	1	1	1	1	1
219	173	1	1	6	almond, coconut	3	1	2	1	6	2	7	1	1	1	6	1	8	2	2	1	omega369, D	3	3	Garden of Life	2	4	4	50	2	female	1	2	2	4	0	3	1	1	2	none	doctor ordered it	4	1	2	2	2	1	1
220	174	1	1	6		3	2	3	1	3	3	1	1	2	1	6	1	1	2	7	3	centrum	2	1	none	1	5	5	70	3	female	1	3	1	4	1	1	2	2	2	constipation	colonoscopy-ruling out causes of vaginal bleeding	3	3	3	3	3	3	3
221	175	6	7	3		6	6	7	8	7	6	7	6	7	6	3	7	7	7	6	1	none	1	1	none	1	5	5	65	3	female	1	1	1	4	4	3	2	1	2	none	unsure	4	3	3	3	3	3	3
222	176	1	1	2		2	1	4	1	7	1	7	1	1	1	5	2	4	1	7	7	none	1	1	none	1	5	5	60	2	female	1	1	1	5	3	2	1	2	1	none	routine	1	3	3	3	3	1	1
223	177	2	6	1		1	3	1	6	6	6	6	1	2	2	6	2	1	1	1	1	multivitamin	2	1	none	1	5	5	60	2	female	1	2	2	2	3	1	2	1	1	bowel incontinence	routine	1	2	2	3	3	1	1
224	178	5	7	1		1	2	1	5	7	3	3	1	3	2	6	3	2	2	1	6	multivitamin, calcium	3	1	none	1	5	5	65	3	female	1	1	1	2	2	4	1	1	2	none	routine	1	5	5	5	5	1	1
225	179	4	4	5		3	2	6	1	6	2	3	2	2	2	6	2	2	1	1	2	oscal, C, biotin	3	1	none	1	5	5	75	3	female	1	1	1	4	2	1	2	2	2	none	mother had colon cancer	1	3	3	3	3	3	3
226	180	2	5	1		4	1	3	1	2	3	4	3	2	1	4	2	1	1	1	3	none	1	1	none	1	5	5	75	3	male	2	1	3	3	2	2	1	2	1	none	Barrets	3	3	3	3	3	3	2
229	181	5	5	2		1	1	1	5	5	1	4	3	3	3	5	4	5	2	4	3	D	3	1	none	1	5	5	85	3	male	2	3	1	5	3	2	1	2	2	none	check for cancer	3	5	5	5	5	4	2
230	182	2	1	6		2	2	1	2	3	4	3	2	2	2	2	2	2	2	1	2	none	1	3	unsure	3	3	3	30	1	female	1	2	2	5	0	1	2	2	2	constipation	EGD	1	3	3	3	3	1	1
231	183	3	1	1		2	1	3	1	5	1	7	1	2	2	9	2	4	1	1	6	B, COQ10	3	3	unsure	3	4	4	65	3	female	1	1	3	5	2	2	1	1	2	hearburn or reflux	reflux	2	2	2	2	2	1	1
233	184	4	4	1		2	1	3	3	7	2	3	3	3	3	3	3	3	2	1	2	biotin	3	1	none	1	5	5	20	1	female	1	3	1	2	0	2	2	2	1	none	before surgery	1	5	5	5	5	1	1
234	185	4	6	1		1	1	6	3	3	3	4	3	3	2	3	3	2	3	7	1	D	3	1	none	1	5	5	30	1	male	2	1	1	5	3	5	1	2	2	heartburn or reflux	to confirm if I have celiac disease	3	3	3	3	3	1	2
235	186	3	6	2		2	2	4	6	4	2	3	3	4	2	4	3	2	2	1	1	none	1	1	none	1	5	5	70	3	male	2	1	1	4	3	2	1	2	2	none	check the results of a PET scan	3	5	5	5	5	1	1
236	187	1	3	2		2	1	2	1	7	1	5	2	3	2	8	2	3	2	3	3	none	1	1	none	1	5	5	35	1	female	1	1	3	5	0	2	2	2	1	bloating or gas, diarrhea	celiac	1	3	3	3	3	3	1
237	188	1	1	5		1	1	1	5	7	5	5	1	1	1	7	2	1	2	1	1	D	3	1	none	1	5	5	75	3	male	2	1	1	4	0	1	2	2	2	bloating or gas	check for diverticulitis	3	5	5	5	5	1	1
238	189	1	6	2		2	1	1	2	4	2	1	2	1	2	7	2	3	1	1	2	none	1	1	unsure	3	1	1	70	3	male	2	4	3	2	2	2	1	2	2	bloating or gas, constipation, heartburn or reflux	5 year screen	1	4	4	4	4	3	3
239	190	4	4	5		2	2	2	1	5	2	6	2	2	1	7	3	2	2	1	6	C, D, omega 3, probiotic	3	3	PB-8	2	4	4	60	2	female	1	1	1	5	2	2	1	2	2	none	screening + have been on antibiotics over past year (Lyme)	1	2	1	3	1	1	1
241	191	3	3	6	almond	1	1	2	3	4	2	4	1	2	2	1	2	2	2	1	2	none	1	1	none	1	5	5	50	2	male	2	2	2	3	1	2	1	2	2	none	unsure	4	3	3	1	2	1	1
243	192	1	1	1		2	2	2	2	3	2	3	3	3	2	5	4	6	3	2	1	none	1	2	culturelle	2	4	4	55	2	male	2	4	3	5	2	4	1	2	2	none	check	1	3	3	3	3	3	3
247	193	2	2	1		2	2	2	2	2	2	2	2	2	2	2	2	2	2	1	1	prenatal, citracal, D	3	1	none	1	5	5	65	3	male	2	2	2	3	0	2	1	2	2	heartburn or reflux	PFT numbers low	3	3	3	3	3	1	1
249	194	2	2	2		2	2	4	1	2	2	3	1	2	2	6	4	1	1	1	5	centrum	2	1	none	1	5	5	60	2	female	1	1	1	5	0	1	2	2	1	none	colonoscopy, age, family history	1	3	3	3	3	2	2
250	195	3	3	1		1	2	4	6	7	3	3	1	1	2	6	3	2	3	7	4	multivitamin	2	2	unsure	3	3	3	50	2	female	1	3	1	4	1	3	1	2	2	bloating or gas, constipation	concerns with cancer diagnosis in family	1	2	4	1	2	2	2
251	196	8	8	5		2	2	7	1	6	1	2	2	7	1	3	3	1	2	1	3	none	1	1	none	1	5	5	70	3	male	2	1	3	4	1	1	2	1	2	none	current check up	1	3	3	2	3	2	2
253	197	2	6	1		1	1	3	4	4	1	3	6	7	2	3	3	2	1	2	1	B12	3	1	none	1	5	5	65	3	female	1	1	1	4	1	4	1	2	2	none	unsure	4	3	3	3	3	2	2
254	198	2	2	2		5	1	4	6	3	1	2	4	3	1	3	3	1	4	1	1	none	1	1	none	1	5	5	20	1	female	1	1	1	3	0	4	2	1	2	abdominal pain, bloating or gas	abdominal pain	2	3	3	3	3	3	3
255	199	1	1	6		2	1	4	1	6	1	4	2	2	2	4	2	3	2	6	3	none	1	1	none	1	5	5	40	1	female	1	2	2	5	1	3	1	2	2	abdominal pain, constipation, diarrhea	abdominal pain	2	3	3	3	3	1	1
259	200	2	1	6		2	2	1	1	1	1	3	3	2	3	1	1	4	2	7	2	gummy multivitamin	2	1	none	1	5	5	30	1	male	2	2	2	4	0	1	2	2	2	abdominal pain, bloating or gas, constipation, heartburn or reflux	colonoscopy-defecation problems	2	3	3	3	3	3	3
261	201	3	3	2		2	2	2	2	3	4	2	2	2	2	3	3	6	2	2	2	none	1	1	none	1	5	5	55	2	male	2	2	2	3	3	2	1	2	2	none	routine	1	3	3	3	3	3	3
263	202	1	1	6		2	1	4	1	1	2	4	2	3	1	3	2	1	3	6	2	none	1	1	none	1	5	5	75	3	male	2	1	3	5	3	2	1	2	2	none	familiy history of colon cancer	1	5	5	5	5	1	1
264	203	5	5	5		1	1	1	1	5	2	1	1	1	1	4	1	1	1	1	4	D	3	2	unsure	3	4	4	70	3	male	2	1	3	5	2	2	1	1	2	none	5 year routine	1	2	3	3	2	1	1
265	204	1	1	6		3	1	3	1	2	1	2	1	1	2	2	3	2	2	1	4	multivitamin	2	3	Activia	2	1	1	50	2	male	2	1	1	5	0	1	2	2	2	none	screen	1	2	5	5	5	4	4
266	205	6	6	2		2	1	2	2	7	1	1	6	3	1	5	3	1	1	1	1	none	1	1	none	1	5	5	75	3	male	2	1	1	5	3	2	1	1	2	heartburn or reflux	screen	1	5	5	5	5	1	1
268	206	7	1	6	almond	1	1	2	5	6	1	3	1	1	2	3	2	6	1	1	4	none	1	1	none	1	5	5	30	1	male	2	1	2	3	0	0	2	2	2	none	check for inflammation	3	5	5	5	5	1	1
270	207	3	3	2		4	2	4	3	3	2	3	2	2	2	5	3	2	3	3	2	centrum	2	2	unsure	3	1	1	60	2	male	2	4	3	4	0	2	1	2	2	none	routine	1	3	3	3	3	3	3
271	208	6	6	2		2	2	6	5	5	2	4	2	2	2	4	2	4	4	8	1	none	1	1	none	1	5	5	70	3	male	2	1	3	3	1	2	1	2	2	bloating or gas, diarrhea	ultra sound of pancreas	3	5	5	5	5	2	2
272	209	2	2	5		2	1	4	6	6	1	4	1	1	3	3	2	3	1	1	3	C, D	3	1	none	1	5	5	60	2	female	1	2	2	4	3	3	1	1	2	constipation	history of colon cancer	1	1	2	3	3	1	1
273	210	2	2	5		1	1	3	6	6	1	5	2	2	1	3	2	6	1	7	2	B12, D	3	1	none	1	5	5	80	3	male	2	1	3	5	0	2	1	1	2	hearburn or reflux	barrett's esophagus	3	3	3	3	3	5	5
274	211	4	1	6		1	1	1	1	7	1	3	2	1	1	4	3	3	1	1	3	none	1	1	Millers	2	1	1	30	1	female	1	1	1	4	0	1	2	1	1	abdominal pain, bloating or gas	rule out GI conditions	2	3	3	3	3	1	1
275	212	3	3	2		2	2	4	1	7	3	4	2	3	1	5	3	3	2	5	2	multivitamin, B12, biotin, calcium, B complex, magnesium	3	1	none	1	5	5	70	3	female	1	1	1	5	3	2	1	2	2	none	polyps in colon	3	3	3	3	3	4	5
276	213	2	2	2		2	2	4	5	5	3	4	2	4	3	5	3	4	2	1	1	none	1	1	none	1	5	5	80	3	male	2	1	3	3	2	6	1	1	2	none	barretts	3	5	5	5	5	1	1
278	214	2	5	2		2	2	3	1	5	4	4	2	1	3	4	2	3	3	9	3	calcium, D	3	1	none	1	5	5	65	3	female	1	1	3	4	0	0	2	2	2	none	routine	1	5	5	5	5	1	1
279	215	1	5	1		1	2	2	2	5	2	5	1	1	1	5	2	5	2	1	2	C, D	3	3	unsure	3	1,3	6	60	2	female	1	1	3	3	2	2	2	2	2	bloating or gas, constipation	family history	1	2	2	2	2	1	1
280	216	4	8	3		2	2	4	2	3	4	4	2	4	3	5	2	3	3	1	3	multivitamin	2	1	none	1	5	5	60	2	male	2	1	1	2	2	2	1	2	2	heartburn or reflux	endoscopy	1	3	3	3	3	5	5
281	217	2	2	2		3	2	3	4	4	4	3	3	2	2	5	3	2	4	5	2	B12, calcium	3	2	unsure	3	1,4	6	55	2	female	1	3	1	2	2	3	1	2	1	none	routine	1	3	3	3	3	2	2
282	218	1	1	6		1	1	1	1	7	1	6	1	2	2	8	1	6	3	1	2	B12, folic acid, magnesium citrate	3	1	none	1	5	5	35	1	female	1	1	1	5	2	4	1	1	1	abdominal pain, bloating or gas, constipation	looking for damage in small intestine due to celiac disease	3	3	3	3	3	1	1
283	219	2	2	1		3	2	2	2	2	3	1	2	2	1	2	3	3	3	1	3	D, B12	3	1	none	1	5	5	40	1	female	1	3	3	4	1	2	2	2	2	constipation	regular screening	1	3	3	3	3	2	2
285	220	3	3	2	lactaid	2	2	4	2	4	1	4	2	2	4	4	3	3	2	1	1	multivitamin	2	3	kombucha, yogurt probiotic drink	2	1	1	65	3	female	1	2	2	2	2	3	1	2	1	bloating or gas, constipation, diarrhea	iron count low, colon cancer survivor	3	1	1	2	1	1	1
288	221	1	6	2		2	1	3	1	7	4	4	2	2	1	7	4	4	2	4	7	none	1	2	Align	2	1	1	65	3	male	1	1	1	5	0	1	2	2	2	abdominal pain, bloating or gas, constipation, diarrhea, heartburn or reflux	episodic diarrhea/constipation with urgency and cramping	2	5	5	5	5	3	1
290	222	1	6	5		2	1	4	1	6	4	5	2	3	2	5	3	2	2	1	6	B12, D, calcium, AREDS 2 eye vitamins	3	1	none	1	5	5	70	3	female	1	1	1	5	1	2	1	2	2	constipation, diarrhea	routine colonoscopy	1	4	4	4	4	1	1
293	223	2	2	5		2	1	2	1	5	2	3	2	1	1	4	3	2	3	3	4	none	1	1	none	1	5	5	35	1	female	1	1	1	3	0	2	1	2	2	heartburn or reflux	follow up to POEM	1	5	5	4	4	2	1
294	224	5	5	2		1	2	5	6	5	2	4	2	3	2	5	3	3	2	4	3	multivitamin	2	2	unsure	3	1	1	65	3	male	2	1	1	5	3	2	1	2	2	abdominal pain	had reflux a couple of months ago	2	3	3	3	3	3	1
295	225	3	9	2		1	1	1	1	1	1	1	1	1	1	1	1	1	1	1	1	none	1	1	none	1	5	5	75	3	male	2	2	2	3	2	2	1	2	2	abdominal pain, bloating or gas, constipation, heartburn or reflux	follow up due to abdominal pain	2	2	2	1	2	1	1
296	226	1	6	3		3	2	5	2	4	3	3	2	1	2	2	2	4	2	9	1	D, B12	3	1	none	1	5	5	65	3	male	2	1	2	5	4	3	1	1	2	none	routine	1	5	5	5	5	1	1
297	227	3	6	2		2	1	4	2	3	3	4	3	3	1	4	3	1	2	7	1	none	1	1	none	1	5	5	70	3	male	2	1	2	1	2	1	2	2	1	none	unsure	4	3	3	3	3	3	3
298	228	1	2	4		2	1	4	3	2	2	4	2	2	2	3	4	4	2	1	1	C	3	3	unsure	3	1,4	6	50	2	female	1	1	1	3	1	3	1	2	2	none	pneumonia	2	1	1	1	1	1	1
299	229	1	2	1		1	2	1	4	7	1	7	3	2	5	7	2	6	2	8	1	none	1	1	none	1	5	5	70	3	male	2	1	3	4	2	2	1	2	2	none	esophageal cancer follow up	1	3	3	3	3	1	1
300	230	2	8	5		2	2	2	2	3	1	3	2	2	2	6	3	2	2	1	2	none	1	1	none	1	5	5	70	3	male	2	1	1	5	2	1	1	2	2	heartburn or reflux	routine colonoscopy	1	5	5	5	5	3	3
301	231	2	7	5		2	1	3	1	7	1	7	1	2	1	7	2	8	1	1	1	B12, COQ10, multivitamin, calcium, papaya enzyme	3	1	none	1	5	5	50	2	female	1	1	1	4	1	3	1	1	2	none	see if I have acid reflux as a result of POEM	2	3	3	3	3	2	2
306	232	1	6	2		2	1	1	1	6	2	4	1	1	3	6	3	4	3	1	4	none	1	1	none	1	5	5	40	1	female	1	1	1	4	0	2	1	2	2	abdominal pain, bloating or gas, bowel incontinence, constipation, diarrhea	colonoscopy	1	5	5	1	1	1	1
307	233	3	7	3		3	2	6	3	8	3	7	3	2	1	3	3	1	3	9	2	C	3	1	none	1	5	5	55	2	female	1	2	2	4	4	5	2	1	2	bloating or gas, heartburn or reflux	routine	1	3	3	3	3	1	1
308	234	1	1	6		3	2	3	3	4	2	4	2	2	2	2	2	4	2	1	3	multivitamin	2	1	none	1	5	5	55	2	male	2	3	1	5	2	4	1	2	2	disrupted swallowing, heartburn or reflux	difficulty swallowing	2	3	3	3	3	1	1
309	235	3	3	5		1	1	4	4	5	2	7	1	3	5	5	2	4	1	1	1	multivitamin, fish oil, C	3	3	unsure	3	1	1	75	3	female	1	3	1	3	0	1	2	2	2	none	routine	1	1	1	1	1	1	1
310	236	7	6	1		2	7	6	3	6	6	6	7	8	6	2	2	2	6	1	2	none	1	3	Greek fruits	2	1,4	6	65	3	female	1	1	1	4	3	3	2	2	2	none	routine	1	2	1	1	1	1	1
311	237	6	6	3		2	2	2	2	6	2	4	3	4	2	5	3	4	3	1	1	none	1	1	none	1	5	5	85	3	male	2	1	1	2	2	2	1	2	2	none	cough up blood	2	3	3	3	3	1	1
312	238	3	3	1		2	1	5	3	5	2	2	2	2	1	5	2	2	1	1	2	none	1	1	none	1	5	5	55	2	male	2	1	1	3	0	2	2	2	2	none	because of my age	1	2	2	1	1	1	1
313	239	2	2	1		1	1	7	1	3	3	3	3	3	1	4	2	7	1	1	1	none	1	1	none	1	5	5	50	2	female	1	1	1	4	2	3	1	2	2	disrupted swallowing, heartburn or reflux	reflux	2	2	3	3	3	1	1
314	240	1	1	6		2	2	5	2	6	4	5	1	3	2	7	2	3	2	1	1	none	1	1	none	1	5	5	65	3	female	1	3	1	3	3	2	2	2	2	none	routine	1	3	3	3	3	3	3
315	241	2	2	5		2	2	6	6	7	1	6	2	3	2	7	3	3	1	1	2	calcium	3	1	none	1	5	5	65	3	female	1	1	3	5	2	3	1	2	2	none	routine 10 year colonoscopy	1	5	5	5	5	1	1
316	242	3	1	6		1	2	3	2	7	1	4	2	2	3	6	3	3	2	1	2	none	1	1	none	1	5	5	25	1	male	2	1	1	5	0	2	1	2	2	bloating or gas, diarrhea	symptoms	2	5	5	5	5	1	1
317	243	6	7	3		2	1	7	6	7	2	4	2	3	2	7	2	5	1	3	2	none	1	1	none	1	5	5	55	2	female	1	1	1	5	2	1	2	2	2	constipation	cologuard test was positive	3	3	3	3	3	1	2
318	244	1	1	1		3	3	3	1	3	1	2	3	3	2	4	4	2	2	7	2	D, omega 3, B12, multivitamin	3	1	none	1	5	5	70	3	male	2	1	1	2	0	2	1	2	2	none	rectal bleeding	2	3	3	3	3	3	1
320	245	6	6	5		1	2	2	1	7	1	4	1	1	1	6	2	7	2	1	2	caltrate, D	3	1	none	1	5	5	70	3	female	1	1	1	5	3	2	1	2	2	none	routine screening	1	5	5	5	3	1	1
321	246	2	2	5		2	2	3	1	4	2	4	2	2	3	5	3	4	2	5	1	multivitamin, D	3	1	none	1	5	5	60	2	female	1	1	1	4	0	2	1	2	2	none	history of polyps	1	3	3	3	3	1	1
322	247	2	1	6		2	2	3	1	6	1	4	2	2	2	3	1	2	3	4	3	D, multivitamin	3	2	unsure	3	4	4	35	1	female	1	1	1	4	0	2	1	2	1	bloating or gas, constipation, diarrhea	constipation/diarrhea	2	3	3	3	2	1	1
326	248	4	4	2		2	2	3	3	2	2	3	3	5	2	3	4	1	3	2	3	multivitamin, A, D, E, K	3	2	unsure	3	1,2	6	30	1	female	1	1	1	4	0	2	2	1	1	bloating or gas	study	3	2	2	3	2	1	1
327	249	2	1	6	plant milks	3	1	2	1	8	5	7	3	1	2	7	2	6	2	1	2	D, A, mineral complex, ALA, NAC, glutathione, fish oil	3	2	Boulardii	2	4	4	60	2	female	1	4	3	4	2	3	2	1	2	none	routine screening	1	5	5	2	2	1	1
328	250	1	2	2		2	1	6	1	6	6	6	2	2	1	6	3	2	6	2	2	B12, D	3	1	unsure	3	1	1	60	2	female	1	1	1	2	2	3	1	1	2	abdominal pain, bloating or gas, heartburn or reflux	acid reflux, abdominal discomfort	2	3	3	3	3	3	3
329	251	1	1	6		2	2	4	4	5	3	5	2	2	2	5	2	2	3	5	1	D, iron, calcium	3	3	yogurt, probiotic tea	2	4	4	65	3	female	1	1	1	4	2	1	2	2	2	abdominal pain, bloating or gas	endoscopy for bariatric surgery	1	3	2	4	4	1	1
330	252	2	2	1		3	2	1	1	3	2	3	3	4	2	3	3	1	2	1	1	iron, D, B6, magnesium, riboflavin	3	1	none	1	5	5	35	2	female	1	3	1	3	1	2	2	2	2	none	bariatric surgery	1	3	3	3	3	3	3
331	253	2	2	1		2	1	3	3	7	4	3	2	3	1	4	2	2	2	1	3	none	1	1	none	1	5	5	70	3	female	1	1	1	5	1	2	1	2	2	none	follow up colonoscopy	1	5	5	5	5	3	3
334	254	2	8	2		1	2	2	1	6	4	4	1	1	1	3	2	1	1	1	1	multivitamin	2	1	none	1	5	5	70	3	female	1	1	3	5	1	2	1	2	2	none	lung mass	3	5	5	5	5	3	3
335	255	1	2	1		2	1	1	4	6	2	3	4	3	1	5	3	2	8	2	2	none	1	1	none	1	5	5	50	2	female	1	2	2	4	0	2	2	2	2	diarrhea	routine	1	5	5	5	5	2	2
336	256	4	6	3		2	2	3	3	3	2	3	3	2	2	3	3	3	3	2	1	magnesium, C	3	1	none	1	5	5	55	2	male	2	1	3	4	4	5	1	1	1	heartburn or reflux	shortness of breath, decreased PFTs	3	3	3	3	3	2	2
338	257	3	3	2		3	1	4	4	5	4	5	2	3	5	4	3	5	3	4	2	none	1	2	unsure	3	1	1	35	1	female	1	2	2	3	2	4	1	2	2	abdominal pain, bloating or gas, constipation	abdominal pain/gas/rectal blood	2	5	3	3	3	3	3
339	258	2	3	2		2	3	5	3	2	2	2	2	2	2	2	3	2	2	6	2	none	1	1	none	1	5	5	70	3	male	2	4	3	1	3	3	1	2	2	bloating or gas	routine, cancer rectum	1	3	3	3	3	3	3
340	259	2	5	3		3	2	3	6	7	6	7	6	6	6	7	6	6	2	2	2	none	1	1	none	1	5	5	50	2	male	2	3	1	2	0	0	2	2	2	none	unsure	4	1	1	1	1	3	3
341	260	4	6	5		3	1	4	6	6	2	6	2	2	2	6	2	4	2	1	6	multivitamin	2	1	none	1	5	5	75	3	male	2	1	3	5	1	2	1	1	2	none	14 years since last	1	5	5	5	5	1	1
342	261	2	6	2		1	1	2	1	6	6	3	6	6	6	2	2	2	2	1	1	none	1	2	unsure	3	4	4	55	2	female	1	3	1	2	0	2	2	1	2	none	colon cancer recent	3	1	1	1	1	1	1
345	262	2	5	2		5	3	5	4	4	5	4	5	2	2	5	3	1	2	1	1	none	1	1	none	1	5	5	60	2	female	1	3	1	4	1	1	1	2	2	none	age	1	3	3	3	3	1	1
347	263	1	7	2		1	2	3	2	8	1	5	1	2	1	6	2	7	2	2	1	multivitamin, fish oil, ginkho bilopa, C, glucosomine	3	2	unsure	3	1	1	75	3	female	1	1	3	5	2	2	1	1	2	bloating or gas, heartburn or reflux	routine + GERD, learn cause of chest pain	2	5	3	3	2	1	1
348	264	1	1	2		2	2	3	3	6	1	6	2	2	1	3	3	2	1	1	6	none	1	1	none	1	5	5	60	2	male	2	1	1	5	2	3	1	2	2	none	unsure	4	5	5	5	5	2	2
349	265	1	1	6		1	2	4	1	4	4	5	2	1	2	2	2	5	1	1	2	none	1	1	none	1	5	5	65	3	female	1	4	3	4	3	2	1	2	2	none	unsure	4	3	3	3	3	1	1
350	266	3	6	2		0	1	6	3	3	3	3	2	3	3	2	3	2	2	1	1	none	1	1	none	1	5	5	55	2	male	2	2	2	2	1	4	1	2	2	none	ERCP	1	3	3	3	3	2	2
353	267	3	2	1		3	2	4	4	5	3	4	5	3	3	5	3	3	4	1	7	Whole Foods multivitamin, D	3	3	Costco 10 Billion CFU x3 QD	2	4	4	45	2	male	2	1	3	5	1	1	1	2	2	abdominal pain, bloating or gas, bowel incontinence, diarrhea	Crohn's disease, colectomy 5x	3	2	2	3	2	2	2
354	268	1	6		Milk ensure plus	3	1	3	6	3	1	6	2	3	4	4	2	2	2	1	1	none	1	2	yogurt	2	4	4	75	3	male	2	2	2	1	7	4	2	2	2	abdominal pain, heartburn or reflux	vomited dark fluid one month ago	3	3	3	3	3	1	1
355	269	3	5	2		1	2	6	2	8	6	7	2	2	2	6	2	3	2	2	2	centrum womens	2	2	unsure	3	1	1	60	2	female	1	1	1	5	2	4	1	1	2	heartburn or reflux	gastric stents removed	3	2	3	3	3	2	2
356	270	1	6	2	lactose free	3	1	3	6	6	5	3	3	4	1	6	4	3	3	2	2	Spectrum multivitamin, C, D	3	1	unsure	3	1	6	60	2	male	2	1	1	5	0	1	2	2	2	abdominal pain, bloating or gas	loss of weight, prior polyps, family hx colon cancer	3	3	3	3	3	3	3
357	271	1	1	6		1	1	1	6	6	2	1	1	2	4	2	2	1	1	1	3	multivitamin	2	1	none	1	5	5	90	3	male	2	2	2	1	6	2	1	2	2	disrupted swallowing	not able to swallow	2	3	3	3	3	1	1
358	272	3	3	3		1	2	2	3	2	3	3	2	2	3	2	2	2	2	1	2	D, B12, calcium	3	2	none	1	5	5	50	2	female	1	2	2	2	3	4	1	2	2	abdominal pain, bloatin gor gas, constipation	abdominal pain, constipation	2	3	3	3	3	1	1
360	273	1	1	6		3	1	2	8	2	2	1	3	3	2	4	3	2	2	1	1	none	1	1	none	1	5	5	75	3	male	2	3	1	5	1	3	1	2	2	none	follow up on gastrointestinal healing	1	3	3	3	3	5	5
361	274	2	6	3		1	2	6	7	6	3	4	2	3	6	6	3	3	2	2	1	calcium, citracal, B12	3	1	none	1	5	5	50	2	female	1	2	2	1	3	5	1	2	2	heartburn or reflux	acid reflux	2	3	3	3	3	1	1
363	275	4	4	1		1	1	3	3	5	3	4	2	1	3	5	2	2	1	1	2	prenatal, folic acid	3	1	none	1	5	5	30	1	female	1	2	2	2	0	5	2	2	2	none	bypass	1	1	2	3	3	1	1
364	276	4	7	2		2	2	2	1	5	4	2	2	2	4	8	2	1	2	1	1	centrum silver, boost with extra protein	2	1	none	1	5	5	80	3	female	1	1	3	5	0	1	2	2	2	disrupted swallowing, heartburn or reflux	problem swallowing some foods and pills	2	1	1	3	1	1	1
365	277	4	4	2		1	1	2	4	5	6	3	4	3	5	4	2	5	2	1	1	centrum	2	1	none	1	5	5	60	2	male	2	2	2	3	3	2	1	2	2	constipation			3	3	3	3	1	1
366	278	3	3	2	lactaid	2	1	2	2	2	1	1	2	1	1	1	2	1	1	1	1	none	1	1	none	1	5	5	50	2	male	2	2	2	2	0	1	2	2	2	none	endoscopy	1	3	3	3	3	3	3
367	279	1	1	6		1	1	1	5	5	1	5	1	1	2	5	1	5	1	1	3	none	1	2	unsure	3	1	1	80	3	male	2	3	1	5	2	1	2	2	2	none	rectal bleeding	2	3	3	3	3	5	5
368	280	2	3	1		2	2	3	3	3	1	4	3	2	2	6	4	2	2	1	2	Beauty Food by Bodyism	3	2	unsure	3	4	4	65	3	male	2	1	3	4	0	2	2	1	2	none	routine/preventative	1	3	3	3	2	1	1
369	281	6	6	3		2	1	1	2	5	4	3	3	3	2	2	3	6	3	1	1	none	1	2	culturelle, bluebonnet	2	4	4	75	3	male	2	1	1	5	0	1	2	2	2	none	past polyps-bleeding	1	3	3	3	3	2	2
370	282	4	1	5	skim plus	2	1	1	1	3	1	1	2	2	1	2	3	2	2	1	1	D, B	3	1	none	1	5	5	70	3	female	1	1	3	5	0	2	2	2	2	none	unsure	4	3	3	3	3	3	3
371	283	2	2	5		1	1	1	3	4	2	1	2	2	4	4	2	1	1	2	1	multivitamin, folate, biotin, calcium	3	3	yogurt	2	1,2,3	6	55	2	female	1	3	1	5	0	3	1	1	2	abdominal pain, bloating or gas, disrupted swallowing	remove a clip/stent based on leak	3	1	1	1	1	2	2
372	284	1	5	2		1	1	3	1	9	1	8	1	2	2	4	3	1	2	1	1	probiotic, iron, B12, multivitamin	3	2	Align	2	4	4	50	2	female	1	1	3	3	2	4	2	1	2	heartburn or reflux	unsure	4	2	2	2	2	1	2
373	285	1	1	6		2	2	6	2	7	1	2	2	2	2	2	2	7	2	1	2	D	3	1	none	1	5	5	70	3	male	2	2	2	3	1	1	2	2	2	none	13 years since the last one	1	5	5	5	5	1	1
375	286	6	5	3		2	2	2	2	6	3	5	2	6	3	6	6	3	2	1	1	none	1	1	none	1	5	5	50	2	female	1	2	2	1	3	4	1	1	2	abdominal pain, bloating or gas, constipation	because I was vomiting blood	2	3	3	3	3	3	2
377	287	1	3	2		2	1	6	1	4	2	3	1	2	2	6	2	2	2	1	3	none	1	2	unsure	3	1	1	70	3	female	1	4	3	4	2	2	1	2	2	heartburn or reflux	GERD	2	2	2	3	3	1	1
378	288	2	6	2		2	2	1	1	4	3	4	3	2	3	4	5	3	3	1	4	D	3	3	yogurts	2	2	2	50	2	female	1	4	3	5	2	2	2	2	1	abdominal pain, bloating or gas, bowel incontinent, diarrhea, heartburn or reflux	colonoscopy	1	3	3	4	4	4	5
379	289	1	1	6		2	2	3	1	3	2	2	2	1	2	2	3	2	2	1	1	multivitamin, C, D	3	1	none	1	4	4	60	2	male	2	1	1	3	1	2	1	2	2	none	find out bleeding source	3	3	3	3	3	3	3
380	290	1	7	5		1	1	2	1	7	3	5	1	2	2	7	3	2	3	1	3	none	1	1	unsure	3	2	2	50	2	female	1	1	1	5	2	2	1	2	2	none	screening	1	4	2	5	4	1	3
381	291	2	3	3		2	2	3	2	3	3	3	3	2	2	3	3	6	2	1	4	none	1	2	unsure	3	4	4	60	2	male	2	3	3	3	1	5	1	1	2	abdominal pain, bloating or gas, bowel incontinence, constipation, diarrhea	abdominal pain and constipation	2	1	1	1	1	1	1
382	292	4	7	2		2	2	2	1	2	4	1	3	4	1	4	3	3	2	1	1	calcium, D, multivitamin, omega 3	3	1	none	1	5	5	55	2	female	1	1	3	3	2	2	2	2	1	bloating or gas, disrupted swallowing, heartburn or reflux	rule out rejection or infection	3	5	5	5	5	2	2
383	293	3	2	1		4	1	3	4	2	3	3	7	3	2	4	4	4	5	1	4	none	1	1	none	1	5	5	35	1	male	2	1	3	4	0	1	2	1	2	abdominal pain	stent removal	3	5	5	5	5	2	2
384	294	3	8	2		1	1	3	6	4	3	3	2	3	4	6	3	4	2	1	7	B complex	3	1	none	1	5	5	60	2	male	2	2	2	5	0	1	2	2	2	hearburn or reflux	pancreas	3	5	5	5	5	2	1
385	295	1	4	1	half and half	1	1	3	3	7	2	5	2	2	2	3	2	5	2	1	2	multivitamin, D	3	1	none	1	5	5	55	2	male	2	3	3	3	4	1	2	2	2	none	routine	1	3	3	3	3	3	3
386	296	2	2	5		3	2	1	3	2	1	4	3	4	2	2	3	1	2	1	2	none	1	1	none	1	5	5	60	2	male	2	1	1	2	0	2	1	2	1	none	unsure	4	2	2	3	3	2	2
387	297	2	6	5		1	1	2	2	9	1	8	2	2	4	8	2	8	2	1	2	none	1	1	none	1	5	5	55	2	female	1	4	3	5	2	4	1	2	2	none	unsure	4	4	5	5	5	1	1
388	298	2	2	1		4	2	5	2	2	5	4	2	2	2	2	2	2	2	1	1	none	1	1	none	1	5	5	60	2	male	2	3	3	4	2	1	2	2	2	heartburn or relux	unsure	4	5	5	5	5	4	4
389	299	4	2	3		1	1	2	6	4	2	2	1	1	3	4	2	2	3	1	1	none	1	3	kombucha	2	4	4	40	1	female	1	3	1	4	1	3	2	1	2	none	PSC-blockage in liver bile ducts	3	3	3	4	3	1	1
390	300	2	2	1		2	1	2	1	7	6	6	2	3	2	7	4	1	2	6	1	multivitamin	2	1	none	1	5	5	35	1	female	1	1	1	5	3	5	1	2	2	heartburn or reflux	routine	1	5	5	5	5	1	1
391	301	3	3	1		3	3	2	8	6	3	3	4	4	3	2	4	3	4	1	1	B12	3	1	none	1	5	5	50	2	female	1	3	3	3	2	3	2	2	2	heartburn or reflux	reflux	2	1	3	3	3	1	1
392	302	1	1	6		2	2	1	2	3	4	1	3	2	1	1	2	1	4	1	2	none	1	1	none	1	5	5	50	2	male	2	2	2	5	2	4	1	2	2	none	colonoscopy	1	5	5	5	5	2	2
393	303	1	3	2		2	2	2	8	6	3	6	2	2	2	3	3	3	3	1	4	none	1	1	none	1	5	5	50	2	male	2	2	2	4	1	2	2	1	2	none	that age	1	2	3	3	3	1	1
394	304	2	1	6		2	2	6	1	8	2	5	2	2	1	5	4	4	1	1	2	none	1	1	none	1	5	5	75	3	male	2	4	3	5	0	2	2	2	2	none	doctor told me to come in for regular checkup	1	4	3	3	3	5	5
397	305	4	4	2		1	1	5	1	5	2	5	2	2	1	4	4	4	1	1	2	D	3	1	none	1	5	5	80	3	male	2	1	3	4	2	2	1	1	2	none	ordered by doctor	1	5	5	5	5	1	1
398	306	1	4	1		2	1	1	2	6	2	2	1	1	2	3	1	2	1	6	1	none	1	1	none	1	5	5	60	2	female	1	2	2	4	2	7	1	1	2	diarrhea, heartburn or reflux	routine	1	3	3	3	3	3	3
399	307	1	6	5		2	1	5	1	2	3	3	2	2	1	4	2	4	2	7	2	none	1	1	none	1	5	5	65	3	female	1	1	3	5	0	1	1	1	2	bloating or gas, constipation, diarrhea	feelings same as before my hernia repair	2	3	3	3	3	1	1
400	308	1	2	2		1	1	4	4	7	1	5	1	2	1	7	2	1	1	1	1	magnesium, K, C, tumeric	3	2	Roubudue	2	3	3	55	2	male	2	2	2	3	2	2	2	2	2	none	screening	1	2	2	2	2	2	5
401	309	6	1	6	almond milk	3	3	1	2	4	7	5	3	4	3	5	3	3	3	3	4	D, B complex	3	2	Align	2	4	4	60	2	male	2	1	1	5	2	2	1	1	2	abdominal pain	routine 4 years	1	3	3	3	3	5	5
402	310	2	2	2		2	2	7	3	5	5	4	3	3	4	4	3	2	3	2	3	none	1	1	none	1	5	5	60	2	female	1	2	2	3	3	3	2	1	1	bloating or gas	I had a gastric bypass 30 years ago	3	3	3	3	3	5	5
404	311	1	1	6		1	1	3	1	1	2	3	1	1	3	3	1	4	1	6	1	multivitamin	2	1	none	1	5	5	50	2	female	1	2	2	2	2	2	2	1	2	none	routine	1	3	3	3	3	3	3
405	312	6	5	2		8	1	1	1	5	1	4	1	3	1	4	3	2	4	1	4	calcium, B2, B12, D	3	1	none	1	5	5	65	3	female	1	1	1	3	0	2	1	2	2	bloating or gas, bowel incontinence, diarrhea, heartburn or reflux	celiac disease	1	5	5	5	5	1	1
406	313	6	6	3		1	2	6	2	6	2	3	1	1	2	3	3	3	1	2	3	D, B	3	1	none	1	5	5	75	3	female	1	1	3	4	0	1	2	2	2	heartburn or reflux	history of GERD, stomach ulcers and polyps	1	5	5	5	5	1	2
407	314	1	1	6		2	1	6	1	7	1	6	1	2	1	6	3	3	1	1	3	multivitamin, C, calcium, D, magnesium	3	1	none	1	5	5	75	3	female	1	1	1	4	0	2	1	2	2	abdominal pain, bloating or gas	doctor recommend	1	3	3	3	3	1	1
409	315	2	6	2		2	1	6	2	7	3	6	2	2	3	7	3	3	2	6	1	D	3	1	none	1	5	5	60	2	female	1	1	2	5	3	2	1	1	2	bloating or gas	bloating	2	3	3	3	3	1	1
410	316	3	3	5		1	2	6	6	2	6	3	2	2	2	2	2	1	2	1	1	D, calcium, potassium	3	1	none	1	5	5	60	2	male	2	1	1	3	3	2	1	2	1	abdominal pain, bloating or gas, constipation, diarrhea, disrupted swallowing, heartburn or reflux	bloating, thickening of stomach wall	2	3	3	4	4	1	1
411	317	2	6	2		2	2	6	7	7	2	7	2	3	3	4	2	2	2	1	2	A, B	3	1	none	1	5	5	50	2	male	2	2	2	5	2	2	1	2	2	heartburn or reflux	unsure	4	3	3	3	3	1	1
412	318	1	1	2		2	1	4	1	7	1	4	1	2	1	3	3	2	2	1	1	none	1	1	yogurt	2	4	4	60	2	male	2	1	3	3	0	2	1	1	2	none	10 year check up	1	5	5	5	5	5	5
413	319	1	1	6		2	2	2	1	4	4	4	2	2	2	4	3	3	2	6	3	B6, B12, D, folic acid, multivitamin, calcium	3	1	none	1	5	5	60	2	female	1	1	1	5	0	2	1	1	2	bloating or gas	diagnostic	3	3	3	3	3	1	1
414	320	3	3	1		2	2	4	3	6	3	5	2	3	2	5	3	4	1	1	6	calcium, D3, B12, lutein, CoQ10, probiotic	3	2	unsure	3	4	4	70	3	female	1	1	1	4	1	2	1	2	1	none	check up	1	1	1	3	1	3	3
415	321	1	2	2		2	1	1	2	7	3	7	1	2	3	9	2	1	1	1	3	none	1	1	none	1	5	5	60	2	female	1	1	3	5	0	1	2	2	2	abdominal pain, bloating or gas, bowel incontinence, constipation, diarrhea	GI discomfort	2	3	3	3	3	1	1
416	322	2	2	2		2	2	7	2	3	6	3	2	2	1	6	2	1	6	2	1	none	1	1	none	1	5	5	55	2	female	1	3	1	4	2	3	2	2	2	heartburn or reflux	age	1	5	5	5	5	1	1
417	323	2	6	1		2	2	4	6	2	3	3	3	2	2	4	4	2	3	1	4	none	1	1	none	1	5	5	50	2	male	2	1	3	5	1	3	1	2	2	none	preventative	1	3	3	3	3	3	3
418	324	1	1	6		1	1	2	2	2	2	2	1	1	6	6	2	6	2	6	1	B12	3	1	none	1	5	5	50	2	female	1	1	1	5	0	1	2	2	2	none	family history	3	5	5	5	5	3	3
420	325	4	5	3		2	2	3	1	7	6	5	2	2	2	6	4	4	2	1	4	none	1	1	none	1	5	5	55	2	female	1	1	1	5	1	3	2	2	2	none	routine screening	1	3	3	3	4	1	1
421	326	1	4	5	lactaid	1	2	4	2	4	2	2	2	2	1	2	4	2	2	1	1	D, citracal, magnesium, glutamine	3	2	various	2	1	1	70	3	female	1	2	2	3	2	1	1	2	2	bloating or gas, hearburn or reflux	for possible bariatric surgery	3	1	1	1	1	1	1
422	327	3	3	2		2	2	5	2	3	3	4	3	2	3	5	3	4	2	6	2	none	1	1	none	1	5	5	70	3	male	2	1	1	5	3	2	1	2	2	bowel incontinence, heartburn or reflux	crohn's	3	4	5	5	5	3	3
423	328	1	1	6		1	1	4	1	3	2	4	2	2	3	7	2	4	2	1	5	none	1	3	kombucha	2	4	4	55	2	female	1	1	1	5	0	2	1	2	1	none	routine screening	1	4	3	3	3	5	5
424	329	2	3	2	lactaid	2	1	2	3	3	3	3	3	2	1	2	2	2	2	1	2	D	3	1	unsure	1	5	5	50	2	female	1	2	2	3	1	2	2	2	2	none	colonoscopy	1	3	3	3	3	3	3
425	330	1	1	6		1	1	4	1	6	1	3	1	1	2	3	2	1	1	1	1	none	1	1	none	1	5	5	60	2	female	1	2	2	4	2	3	2	2	2	hearburn or reflux	routine	1	3	3	3	3	4	4
426	331	2	2	1		1	2	2	2	3	2	3	2	3	1	1	2	2	1	1	1	C, B complex	3	1	unsure	3	1,3,4	6	70	3	male	2	2	2	1	3	4	2	1	2	none	routine	1	4	2	2	2	3	2
427	332	1	1	6		1	1	8	1	8	1	9	1	5	3	9	4	3	1	1	1	none	1	1	none	1	5	5	65	3	female	1	1	1	3	0	2	1	2	2	heartburn or reflux	family history	1	5	5	5	5	1	5
428	333	2	1	3		1	4	1	5	5	1	1	5	4	1	3	1	5	2		1	D	3	1	none	1	5	5	75	3	male	2	1	3	2	0	1	2	2	2	abdominal pain, constipation, heartburn or reflux	Barrets syndrome	3	3	3	3	3	5	5
430	334	1	1	6		2	2	3	1	5	1	2	3	2	2	2	1	1	5	1	3	none	1	1	none	1	5	5	60	2	female	1	1	1	4	1	1	2	2	1	abdominal pain, heartburn or reflux	to check if ablation got everything	3	5	5	1	5	2	2
431	335	1	4	2		3	1	4	1	4	2	2	1	1	2	6	3	2	1	3	1	none	1	1	none	1	5	5	60	2	male	2	1	1	4	2	5	1	1	2	constipation	broncoscopy	1	3	3	3	3	1	1
432	336	1	6	5		1	1	1	2	7	1	2	1	2	1	5	3	7	2	1	1	folic acid, B, C, calcium, D3, flaxseed oil, B12	3	1	none	1	5	5	65	3	female	1	1	1	4	0	2	2	2	2	none	standard screening	1	3	3	3	3	1	1
433	337	1	1	1		2	1	1	2	3	3	3	2	2	1	3	6	1	1	1	2	none	1	1	none	1	5	5	75	3	male	2	2	2	2	2	1	1	2	2	none	unsure	4	3	2	1	1	1	1
434	338	3	7	1		1	1	1	1	1	1	2	2	2	3	1	2	1	1	1	1	none	1	1	none	1	5	5	70	3	female	1	1	1	4	2	1	2	2	2	heartburn or reflux	check for bleeding, low iron	3	3	3	3	3	4	4
436	339	4	3	5		1	1	3	2	7	2	4	2	2	1	8	3	5	3	2	2	none	1	1	none	1	5	5	40	1	female	1	1	1	5	2	4	1	2	2	bloating or gas, diarrhea	screening	1	3	3	3	3	1	1
437	340	6	6	2		4	1	3	1	6	1	6	1	3	3	4	2	4	2	6	1	none	1	1	none	1	5	5	70	3	female	1	1	1	5	3	2	1	1	2	none	routine	1	5	5	5	5	4	4
438	341	1	1	6		4	1	3	2	2	3	4	2	3	2	6	4	1	3	1	4	none	1	1	none	1	5	5	70	3	female	1	3	3	3	2	1	2	2	2	bloating or gas	polys	3	4	4	4	4	1	1
439	342	1	2	5		2	1	4	1	6	6	6	2	2	1	7	3	6	2	3	1	multivitamin	2	1	none	1	5	5	40	1	female	1	1	1	4	1	3	1	2	2	abdominal pain	EUS	3	5	5	5	5	3	1
441	343	4	5	1		1	1	4	2	5	5	4	3	3	1	5	3	4	3	1	4	multivitamin, fish oil	3	1	none	1	5	5	70	3	male	2	1	1	4	2	2	1	2	2	none	screen	1	3	3	3	3	1	1
442	344	3	3	5		1	1	4	1	4	1	6	1	2	3	5	3	2	2	3	1	multivitamin	2	3	CVS brand	2	1,4	6	45	2	female	1	1	1	5	2	4	1	1	2	bloating or gas, diarrhea, heartburn or reflux	bleeding in stool	2	1	2	3	1	2	2
443	345	3	6	1		2	2	4	4	6	3	4	3	2	4	6	3	5	3	1	2	multivitamin, CoQ10, D	3	3	Nature's Bounty	2	1,4	6	70	3	male	2	1	3	3	0	2	2	2	2	heartburn or reflux	prevention	1	1	3	3	2	2	2
444	346	3	4	3		2	2	2	2	4	2	3	3	3	2	6	4	5	2	2	2	none	1	3	unsure	3	1	1	60	2	male	2	1	1	3	0	3	2	2	1	constipation, diarrhea	colo/rectal screening	1	3	3	3	3	1	1
447	347	2	2	3		1	2	3	3	3	2	3	2	4	3	4	3	2	2	1	2	none	1	1	none	1	5	5	50	2	male	2	2	2	3	2	2	1	1	2	abdominal pain, heartburn or reflux	abdominal pain	2	2	2	3	3	3	1
448	348	3	2	2		1	1	3	2	4	5	4	3	2	1	4	3	3	4	1	3	iron	3	1	none	1	5	5	45	2	female	1	3	1	5	0	2	1	2	2	none	severely anemic	3	3	3	3	3	3	1
450	349	1	2	2		3	1	2	1	3	1	5	2	1	2	3	1	2	1	5	1	none	1	1	none	1	5	5	60	2	female	1	2	2	3	3	2	1	1	2	none	follow up	1	3	3	3	3	1	5
451	350	2	2	6	coconut milk	1	1	3	2	9	4	5	2	3	1	7	4	6	2	1	2	none	1	3	Probulin	2	4	4	30	1	female	1	1	1	5	0	1	2	2	2	abdominal pain, bloating or gas, constipation, heartburn or reflux	pain	2	2	2	2	2	1	1
452	351	6	7	2		2	1	4	1	5	4	4	2	3	2	7	4	3	3	1	3	D	3	1	none	1	5	5	55	2	male	2	1	1	4	2	2	1	1	2	heartburn or reflux	found polyps in the past, routine test	1	5	5	5	5	1	1
453	352	1	7	1		1	1	6	1	4	1	4	1	1	1	4	5	1	1	1	1	none	1	1	none	1	5	5	20	1	male	2	4	3	3	0	6	2	2	2	abdominal pain, heartburn or reflux	reflux	2	3	3	3	3	2	2
454	353	2	8	2		1	1	3	1	5	2	4	2	2	2	7	3	3	2	1	2	none	1	1	none	1	5	5	55	2	female	1	1	3	5	3	5	1	1	2	bloating or gas, constipation	screening	1	4	4	5	5	1	1
455	354	2	4	5		2	2	5	1	7	4	4	2	2	2	4	3	3	3	3	2	Ellura (cranberry supplement)	3	1	none	1	5	5	75	3	male	2	1	1	5	4	2	1	2	2	disrupted swallowing, heartburn or reflux	assess esophagus including a soft tissue lesion	3	3	3	3	3	2	2
457	355	2	2	1		2	1	4	4	3	4	4	3	3	4	4	2	1	1	4	4	none	1	1	none	1	5	5	20	1	female	1	2	2	3	0	2	2	2	1	none	routine	1	3	3	2	3	2	3
459	356	6	6	5		1	1	3	1	6	1	2	1	1	2	3	3	2	2	1	1	none	1	1	none	1	5	5	60	2	female	1	1	1	5	0	1	2	2	1	bloating or gas, diarrhea, heartburn or reflux	checkup recommended by physician	1	5	5	5	5	1	1
461	357	3	3	2		2	1	1	1	3	2	3	1	3	1	4	1	3	3	1	1	none	1	2	Nature's Valley	2	1	1	30	1	female	1	1	1	3	2	4	1	1	2	abdominal pain, bloating or gas, constipation, heartburn or reflux	to figure out why my stomach has so many issues	2	2	2	2	2	2	2
462	358	5	1	5		2	1	5	3	9	1	5	2	1	1	5	2	7	1	1	4	none	1	1	none	1	5	5	70	3	male	2	1	1	5	2	2	1	2	1	none	routine re age/time since previous	1	3	3	3	3	5	5
463	359	3	3	2		2	1	3	1	4	3	3	2	2	2	5	2	3	2	2	3	C, potassium, omega, D	3	3	Stonchange	2	4	4	60	2	male	2	1	1	5	2	2	1	1	2	heatburn or reflux	endoscopy/likely ablation re: Barretts Esophagus	3	1	1	2	2	1	1
464	360	2	2	1		2	2	2	3	3	2	3	3	3	3	4	3	3	2	1	2	iron	3	1	none	1	5	5	25	1	female	1	4	1	4	0	2	2	2	1	abdominal pain, bloating or gas	polyps/pain	2	4	4	4	4	2	2
465	361	2	7	1		1	2	3	3	4	2	3	2	3	2	5	2	3	2	1	1	D, iron, magnesium, C	3	1	none	1	5	5	70	3	male	2	1	1	5	2	2	1	2	2	abdominal pain, bloating or gas, diarrhea	follow up to recent gastric surgery	1	3	3	3	3	2	1
466	362	1	4	2		2	2	1	3	6	5	5	3	2	2	6	4	2	2	1	3	none	1	1	none	1	5	5	35	1	female	1	1	1	5	3	5	1	1	2	bloating or gas, diarrhea	celiac, recheck	1	3	3	3	3	1	1
467	363	1	1	6		2	3	6	6	2	2	3	2	3	3	3	4	1	2	3	6	D, B complex	3	1	none	1	5	5	50	2	female	1	3	3	2	1	1	2	2	1	diarrhea	colonoscopy	1	3	3	3	3	1	1
468	364	5	5	1		2	3	1	1	2	3	2	2	2	2	3	3	2	2	1	3	none	1	1	none	1	5	5	55	2	female	1	1	1	2	0	2	1	2	2	abdominal pain	unsure	4	1	1	1	1	1	1
469	365	2	2	2		3	2	3	3	4	3	3	3	2	2	3	3	5	4	1	1	none	1	3	unsure	3	2	2	70	3	female	1	1	3	5	2	1	2	2	1	abdominal pain, bloating or gas, bowel incontinence, constipation, heartburn or reflux	the symptoms above	2	4	4	5	3	2	2
471	366	2	6	1		3	2	5	7	7	3	2	1	3	1	4	3	1	1	1	3	B12, D	3	1	none	1	5	5	90	3	male	2	1	1	3	1	2	1	2	2	abdominal pain	symptoms	2	5	5	5	5	1	1
472	367	1	6	2		1	1	6	1	6	2	6	2	2	2	6	2	5	2	6	1	multivitamin	2	1	none	1	5	5	55	2	male	2	4	3	4	1	2	1	2	2	disrupted swallowing	swallowing problem	2	3	3	3	3	2	2
476	368	2	7	1		2	1	1	8	7	5	3	3	3	4	4	3	5	4	1	1	none	1	1	none	1	5	5	50	2	female	1	1	1	3	3	2	2	2	2	none	6 mo liver transplant	3	2	3	3	3	1	1
477	369	1	8	3		2	2	2	6	9	1	3	3	3	1	6	3	1	1	3	1	none	1	3	unsure	3	1,4	6	80	3	male	2	1	1	4	2	2	2	2	1	heartburn or reflux	to pinpoint exact problem	2	1	1	1	1	1	1
478	370	9	9	2		1	1	9	4	6	1	8	7	6	1	9	6	9	9	9	1	One a Day 50+	2	1	none	1	5	5	50	2	male	2	1	3	2	0	1	2	2	2	none	unsure	4	3	3	3	3	3	3
479	371	1	6	1		2	1	3	1	2	1	4	2	2	2	6	2	6	2	1	6	none	1	1	none	1	5	5	65	3	male	2	1	3	5	3	2	1	2	2	heatburn or reflux	EGD	1	5	5	5	5	5	5
480	372	2	2	3		3	2	3	4	3	3	3	2	2	6	3	3	2	4	1	2	none	1	1	none	1	5	5	25	1	male	2	2	2	3	0	3	1	2	2	abdominal pain	symptoms	2	5	5	5	5	3	1
481	373	3	3	5		3	1	3	5	6	1	1	3	2	1	5	3	3	3	6	1	multivitamin, tumeric, osteoflex, D, E	3	1	none	1	5	5	65	3	male	2	1	1	4	2	2	1	1	2	none	Barretts esophagus	3	4	5	5	5	1	1
482	374	2	6	2		1	1	3	1	6	1	2	1	2	3	6	2	1	1	1	2	women's daily multivitamin	2	1	none	1	5	5	60	2	female	1	4	1	1	2	3	1	2	2	heatburn or reflux	hemoptysis	2	3	3	3	3	1	1
483	375	6	6	2		2	2	4	4	3	4	3	4	3	2	3	4	2	2	1	2	one a day vitamins for men	2	3	VSL #3	2	1	1	30	1	male	2	2	2	4	0	2	1	1	2	bloating or gas, diarrhea, heartburn or reflux	check colon due to ulcerative colitis	3	3	3	3	3	2	2
484	376	2	1	6		2	2	1	4	3	1	3	1	2	3	5	3	1	2	1	1	mulvitamin, D	3	1	none	1	5	5	50	2	female	1	1	3	5	0	2	2	2	2	bloating or gas	sigmoidoscopy	3	5	5	5	5	1	1
485	377	2	2	1		2	2	7	5	7	6	6	2	2	2	4	2	6	2	1	3	A reds, CBD oil, St. Johns wort	3	2	Culturelle	2	1	1	85	3	male	2	1	3	4	3	2	1	2	2	abdominal pain	count out illness	2	2	5	3	3	1	1
486	378	3	5	2		3	1	5	5	5	3	4	3	3	2	5	4	3	2	1	6	centrum silver for men	2	1	none	1	5	5	75	3	male	2	1	3	4	3	2	1	1	2	none	routine	1	3	3	3	3	1	1
487	379	2	2	1		2	2	4	1	8	2	4	3	2	3	4	2	2	2	1	1	none	1	1	none	1	5	5	60	2	female	1	2	2	4	2	3	1	2	2	bloating or gas	possible bile dilation, liver pain	3	5	5	5	5	1	1
488	380	1	1	6		1	1	1	3	7	1	7	1	2	2	7	2	3	2	6	2	C	3	1	none	1	5	5	75	3	female	1	1	1	5	2	2	1	2	2	none	polyps	3	5	5	5	5	2	2
489	381	1	1	6		1	1	2	1	7	1	7	1	1	6	7	1	6	1	7	2	none	1	1	none	1	5	5	55	2	female	1	1	1	5	0	1	2	1	1	diarrhea	determine if celiacs	3	3	3	3	3	1	1
490	382	2	2	2		3	2	2	1	5	3	4	2	2	2	5	2	4	3	1	4	none	1	1	none	1	5	5	60	2	male	2	1	3	5	2	3	1	2	2	none	colonoscopy check	1	5	5	5	5	1	1
491	383	1	2	2		2	1	6	2	4	1	2	1	2	2	2	2	3	2	1	6	B-12, omega3, tumeric	3	3	unsure	3	3	3	65	3	male	2	1	1	4	3	3	1	2	2	none	colonoscopy	1	2	2	2	2	2	2
492	384	2	6	5		2	1	2	2	4	2	4	2	1	2	5	2	4	1	1	2	none	1	1	none	1	5	5	40	1	female	1	1	1	4	3	7	1	1	2	none	bariatric pre-op	3	3	3	3	3	1	1
493	385	1	1	6		1	1	3	2	4	1	2	2	2	4	5	3	4	2	1	2	E, biotin, women's probiotic	3	3	women's probiotic	2	4	4	25	1	female	1	2	2	3	0	2	2	2	2	none	endoscopy	1	5	5	4	5	1	2
494	386	1	1	6		2	2	3	3	6	3	3	3	2	2	5	3	2	2	1	4	multivitamin, COQ10, fish oil, mganesium, D, fiber	3	3	unsure	3	1,4	6	55	2	male	2	1	1	5	0	1	2	2	2	bloating or gas, heartburn or reflux	barretts esophagus checkup	1	1	2	4	2	1	2
495	387	2	2	3		2	2	6	2	7	3	3	2	3	3	4	3	6	2	6	2	none	1	1	none	1	5	5	55	2	female	1	1	3	3	2	3	1	2	2	abdominal pain, bloating or gas, bowel incontinence, diarrhea, heartburn or reflux	GERD and checkup for colon	1	3	3	3	3	2	2
497	388	1	1	6		1	1	6	2	6	1	7	1	1	4	7	2	7	1	1	1	omega 3, D	3	2	unsure	3	4	4	70	3	female	1	3	1	3	4	1	2	2	2	abdominal pain	symptoms	2	5	5	5	5	4	4
498	389	4	6	3		1	2	4	1	6	3	3	3	3	3	3	3	2	4	2	3	multivitamin	2	1	none	1	5	5	60	2	male	2	1	1	3	2	4	1	2	2	none	barretts esophagus	3	5	5	5	5	5	5
500	390	1	6	5		3	1	6	3	4	6	6	1	3	3	6	3	3	3	1	3	none	1	1	none	1	5	5	75	3	female	1	1	1	5	2	2	1	2	2	diarrhea	endoscopy and colonoscopy for polyps	3	5	5	5	5	4	4
501	391	1	1	6		1	1	2	1	8	1	6	2	1	2	8	2	7	2	9	4	none	1	1	none	1	5	5	50	2	female	1	1	1	5	1	3	1	1	1	heartburn or reflux	over 50, family history of cancer	1	3	3	3	3	3	4
503	392	2	2	1		2	2	4	1	4	2	6	2	3	5	4	2	4	2	6	2	D, C	3	2	unsure	3	1	1	65	3	female	1	2	2	5	2	3	1	2	2	abdominal pain, bloating or gas, heartburn or reflux	pancreatic cyst	3	4	3	3	3	1	1
504	393	3	3	1		2	2	4	6	6	4	4	3	3	1	2	4	1	3	1	1	folic acid, B12, iron tablet, D, potassium, multivitamin	3	3	probiotic yogurts	2	4	4	35	1	female	1	4	3	3	3	4	2	1	2	none	stomach polyps preventive cancer treatment	3	3	3	3	3	1	1
505	394	2	2	3		1	4	1	1	1	1	1	5	5	1	1	4	1	4	8	2	none	1	1	none	1	5	5	60	2	male	2	1	3	3	0	2	1	2	2	abdominal pain	pain	2	4	4	4	5	2	1
506	395	2	3	3		1	1	4	2	5	1	6	2	2	4	8	4	6	1	1	2	krill oil, multi, D3, COQ10, gummies	3	1	none	1	5	5	75	3	female	1	1	1	3	2	2	1	2	2	abdominal pain, bloating or gas, constipation, reflux	second opinion	3	3	3	3	3	2	2
507	396	7	3	2		3	1	3	4	4	1	4	2	3	4	4	3	3	1	6	1	none	1	3	Goga	2	1	1	65	3	male	2	2	2	1	4	3	1	2	2	none	check up	1	3	2	2	2	2	1
508	397	2	7	1		1	1	2	2	6	2	2	2	3	2	3	3	6	2	1	1	multivitamin, calcium	3	1	none	1	5	5	45	2	female	1	2	2	3	5	6	1	2	2	abdominal pain, bloating or gas, bowel incontinence, constipation, heartburn or reflux	stomach pain	2	3	3	3	3	1	1
509	398	3	8	2		3	2	3	1	3	2	2	3	2	1	2	3	2	4	9	3	multivitamin, B12, calcium, D	3	1	none	1	5	5	50	2	male	2	1	1	5	0	1	2	1	2	none	routine check, Barretts esophagus and polyps	1	3	3	3	3	4	5
510	399	3	2	5		1	2	2	6	6	2	6	2	2	1	7	2	4	1	6	6	tumeric, ginger, hair and nails multi	3	1	none	1	5	5	60	2	female	1	2	2	3	2	2	2	2	2	constipation	following up	1	3	3	3	3	1	1
511	400	1	1	6		1	1	3	1	6	3	4	2	2	4	6	1	4	2	6	3	D, tumeric, cartilidge	3	3	TruNature	2	4	4	60	2	female	1	1	1	5	0	2	1	2	1	heartburn or reflux	r/o condition, symptoms	2	2	3	3	3	1	1
512	401	1	1	6		2	1	3	1	6	2	4	2	3	1	7	3	2	1	1	6	none	1	3	Dr. Ohino's	2	1,4	6	60	2	female	1	1	1	3	0	2	1	1	2	abdominal pain, bloatin or gas, constipation	diverticulitis	3	1	1	3	2	1	1
513	402	2	7	1		2	2	3	9	9	3	2	2	2	2	2	3	1	3	1	1	none	1	1	none	1	5	5	50	2	female	1	3	1	3	1	2	1	2	2	heartburn or reflux	colonoscopy	1	4	4	4	4	4	4
514	403	3	4	2		1	1	3	5	6	1	3	4	1	1	3	2	3	1	1	1	none	1	2	unsure	3	3	3	45	2	male	2	4	3	3	3	5	1	2	2	bloating or gas	unsure	4	1	2	1	2	2	1
515	404	2	5	3		1	1	3	2	5	2	4	1	5	2	6	3	6	1	5	1	none	1	2	unsure	3	4	4	40	1	female	1	1	1	2	6	5	1	2	2	abdominal pain	upper endoscopy	1	3	3	3	3	2	1
517	405	2	2	5		1	1	2	2	4	1	2	1	2	2	5	6	4	1	1	2	centrum	2	1	none	1	5	5	50	2	male	2	1	1	5	2	4	1	2	2	none	turned 50	1	5	5	5	5	1	1
518	406	1	1	6		2	1	3	2	6	1	6	2	2	2	6	2	6	2	1	6	none	1	1	none	1	5	5	55	2	male	2	1	3	5	2	3	1	1	2	none	Lynch syndrome	1	5	5	5	5	1	1
520	407	1	1	1		1	2	6	3	6	6	6	3	2	2	2	2	1	3	1	1	multivitamin	2	3	unsure	3	1	1	60	2	male	2	1	1	4	1	3	1	2	1	bloating or gas, heartburn or reflux	endoscopy	1	1	1	2	1	1	1
521	408	3	3	2		2	1	5	2	5	4	4	2	3	3	5	3	2	2	1	4	none	1	1	none	1	5	5	60	2	male	2	1	1	5	0	3	1	2	2	abdominal pain, heartburn or reflux	Barretts esophagus with dysphagia	3	5	5	5	5	1	1
522	409	1	1	5		1	1	4	2	4	2	3	2	3	3	5	3	7	1	1	3	none	1	1	none	1	5	5	50	2	male	2	1	1	5	2	4	1	1	2	none	polyps on ascending colon	3	3	3	3	3	5	5
523	410	2	3	1		3	2	4	5	3	4	5	2	2	2	5	2	2	2	5	5	B-12, multivitamin, D, fish oil, calcium	3	1	none	1	5	5	70	3	female	1	1	1	4	0	2	2	2	2	none	pancreas issues	3	3	5	5	5	3	3
524	411	4	7	3	lactose free	2	2	4	4	2	3	5	2	2	3	5	2	6	3	1	9	none	1	1	none	1	5	5	60	2	male	2	1	1	3	3	2	1	1	1	none	Barrett's esophagus	3	3	3	3	3	1	1
525	412	2	3	2	lactaid	3	2	2	5	3	3	2	3	2	3	3	3	2	2	1	3	none	1	1	none	1	5	5	25	1	female	1	2	2	4	0	2	2	1	2	abdominal pain, bloating or gas, diarrhea	looking for ulcers/anything causing these issues	2	3	3	3	3	2	2
526	413	1	2	1		3	2	2	3	3	1	2	2	3	2	4	3	1	3	1	4	none	1	1	none	1	5	5	30	1	male	2	1	1	4	1	2	1	2	2	heartburn or relfux	endoscopy	1	5	5	5	5	2	2
527	414	4	5	2		3	2	4	3	3	3	3	2	3	4	3	4	3	4	4	2	none	1	2	unsure	3	4	4	40	1	female	1	2	2	2	3	5	1	1	2	diarrhea	routine	1	3	1	1	1	1	1
528	415	1	1	5		1	1	5	1	2	1	2	2	4	3	4	3	1	1	1	2	B-12, calcium	3	1	none	1	5	5	65	3	female	1	2	2	4	0	2	1	2	2	none	heartburn	2	3	3	3	3	1	2
529	416	4	4	3		2	2	4	2	4	2	4	2	2	2	4	2	2	2	1	5	none	1	1	none	1	5	5	70	3	male	2	1	1	5	2	2	1	2	2	none	diagnostic	1	3	3	3	3	1	1
530	417	3	3	2		2	2	6	2	6	1	5	2	3	2	6	3	3	2	1	4	D	3	2	unsure	3	4	4	75	3	female	1	1	1	2	1	2	1	2	2	bloating or gas, disrupted swallowing	nodule on lung	3	2	2	2	2	1	1
531	418	1	1	3		1	2	4	1	2	2	2	2	2	1	2	1	1	2	1	1	women's one a day	2	1	none	1	5	5	50	2	female	1	1	1	4	2	4	2	2	2	abdominal pain, bloating or gas, bowel incontinence, diarrhea, heartburn or reflux	acid reflux	2	4	4	4	4	1	1
532	419	2	2	1		2	2	2	1	4	2	3	2	2	2	2	3	2	2	3	1	one a day	2	1	none	1	5	5	75	3	female	1	1	3	2	4	2	1	2	2	none	unsure	4	5	5	5	5	3	1
533	420	2	1	6		2	2	6	3	6	6	6	2	3	3	6	2	6	2	1	1	none	1	1	none	1	5	5	70	3	female	1	3	1	2	3	3	1	2	2	bowel incontinence, constipation, heartburn or reflux	spot on pancreas	3	3	3	3	3	1	1
534	421	2	2	3		1	1	3	3	4	2	3	4	2	2	6	2	4	5	1	1	none	1	2	unsure	3	3	3	50	2	male	2	3	3	3	4	2	2	2	2	bloating or gas	endoscopy	1	4	3	3	3	3	3
535	422	2	4	2		2	1	3	6	2	2	3	2	2	7	2	3	2	1	1	2	none	1	1	none	1	5	5	35	1	male	2	2	2	3	0	2	2	1	2	abdominal pain, bloating or gas, heartburn or reflux	because I want to stop all of the above	2	1	1	1	1	1	1
536	423	3	5	3		2	1	5	9	5	1	3	3	4	3	5	5	1	1	1	1	none	1	1	none	1	5	5	25	1	male	2	3	1	3	0	1	2	2	2	none	removal of stent	3	1	1	1	1	1	1
537	424	2	7	2		3	1	1	1	6	4	4	2	3	3	4	2	3	3	1	3	D, B12, calcium, fish oil	3	1	none	1	5	5	70	3	female	1	2	2	4	2	2	1	2	2	abdominal pain, constipation	follow up	1	3	3	3	3	1	1
82	425	2	6	1		2	2	5	3	4	2	3	2	2	1	6	3	2	3	6	1	none	1	1	unsure	3	4	4	65	3	male	2	1	1	5	0	1	2	2	2	hearburn or reflux	reflux	2	4	4	3	3	1	1
122	426	1	7	1		2	1	4	2	7	1	5	1	1	2	5	2	3	2	1	3	omega 3	3	1	none	1	5	5	40	1	female	1	3	2	4	1	4	1	2	2	abdominal pain, bloating or gas, constipation	symptoms	2	3	3	3	3	2	2
51	429	1	1	6		1	1	2	2	2	1	3	2	2	1	1	2	2	2	7	3	B, D, vitamin packs	3	1	none	1	5	5	50	2	male	2	1	3	5	4	6	1	2	2	diarrhea	post surgery	3
41	430	4	7	3		1	1	3	7	3	4	2	4	5	1	1	5	1	2	1	3	none	1	1	none	1	5	5	60	2	male	2	1	1	1	3	4	1	1	2	none	to check intestine	1	3	3	3	3	2	2
37	431	1	2	1		2	2	2	3	3	2	3	3	2	2	3	3	2	2	1	3	one a day	2	1	none	1	5	5
22	432	1	6	2		1	1	2	6	3	1	2	1	1	3	6	3	2	1	1	1	none	1	2	unsure	3	4	4	45	2	female	1	2	2		2	4	1	2	2	none	endoscopy	1
19	433	1	2	1		3	1	4	1	6	2	4	2	1	3	7	2	6	3	1	2	none	1	1	none	1	5	5	50	2	female	1	1	2	5	0	2	2	2	2
13	434	2	6	5		1	1	6	1	7	1	6	1	2	3	6	3	5	2	3	1	calcium, D, ocuvite	3	1	none	1	5	5	75	3	female	1	1	1	5	2	2	1	2	2	bowel incontinence, heartburn or reflux	routine	1	3	3	3
97	435	2	2	2		2	1	2	9	1	4	3	9	4	3	9	9	1	5	1	2	none	1	1	none	1	5	5			female	1	2	2	1	1	2	2	2	2	bloating or gas, heartburn or reflux
89	436	3	3	2		1	1	2	4	6	1	5	1	1	1	4	1	1	1	2	2	multivitamin	2	1	none	1	5	5	50	2	female	1	2	2	4	2	3	2	2	2	constipation
129	437	6	6	2		3	2	6	6	6	4	6	2	2	2	4	3	2	2	1	1	none	1	1	none	1	5	5
148	438	1	2	1		2	2	1	1	2	2	2	2	3	1	2	3	2	3	1	2	preplus, calcium, magnesium, iron	3	2	unsure	3	4	4
149	439	2	9	1		3	2	3	1	2	1	6	3	3	3	7	3	6	4	1	1	iron	3	1	none	1	5	5	75	3	female	1	1	1	5	4	1	2	1	2	none	AVMS anemia	3
163	440	3	6	3		1	2	3	2	5	2	4	2	2	3	3	2	2	2	1	2	none	1	1	none	1	5	5	50	2	female	1	2	2	3	2	2	2	2	2	constipation	anemia	3
184	441	1	1	6		2	1	2	1	1	3	5	3	1	2	7	4	6	2	1	4	B	3	2	unsure	3	4	4	55	2	female	1	4	3	4	0	1	2	2	2
195	442	4	4	2		2	1	3	4	1	2	3	3	2	1	4	3	3	1	1	1	none	1	1	none	1	5	5	60	2	male	2	3	3	5	0	1	2	2	2				3	3	3	3	5	4
214	443	1	6	1		1	1	6	1	6	1	4	1	2	2	6	2	3	1	1	1	D, biotin	3	1	none	1	5	5	60	2	female	1	1	1	3	1	1	2	2	2	none	gallbladder	3
228	444	4	4	2		2	2	4	6	7	3	2	1	2	1	6	2	1	1	1	1	one a day, calcium, D, B12, folic acid, tumeric	3	1	none	1	5	5	75	3	female	1	1		5	2	2	1	2	2
240	445	3	3	1		2	2	1	2	2	1	2	2	3	3	2	3	2	2	1	1	none	1	1	none	1	5	5	60	2	male	2	2	2	2	5	4	1	1	1
245	446	3	4	2		2	1	3	2	8	2	6	2	2	2	7	2	6	2	1	2	none	1	1	none	1	5	5	50	2	male	2	1	1	2	2	4	1	1	2	none	colonoscopy	1	3				1	1
246	447	2	3	3		1	1	4	2	5	2	5	1	2	4	5	2	4	1	1	2	none	1	1	none	1	5	5	50	2	female	1	2	2	2	2	4	1	1	2	none	endoscopy	1
257	448	1	1	1		1	1	3	1	4	3	3	2	2	3	4	3	3	1	5	1	none	1	2	unsure	3	4	4	65	3	male	2	3	1	2	3	2	1	2
258	449	1	5	2		1	1	1	5	1	6	1	1	4	1	1	6	1	1	1	1	none	1	3	Align	2	1	1	35	1	female	1	1	1	4	0	2	1	2	2
260	450	5	4	5		2	2	2	1	5	1	1	2	1	1	4	1	1	1	4	1	essense multi	2	3	unsure	3	1	1	25	1	female	1	1		2	0	3	1	2	2
262	451	1	1	1		6	2	2	8	2	1	3	2	2	1	2	2	4	2	5	2	B12	3	2	unsure	3	3	3	50	2	male	2	2	2	2	1	2	2	2	2	none	check up	1
269	452	2	6	1		1	1	2	5	6	4	1	2	3	3	5	3	1	1	1	2	none	1	1	none	1	5	5	50	2	male	2	1	3	2	9	10	1	2	2	none	PJS	3
277	453	1	1	1		2	2	3	1	5	4	3	2	2	1	4	2	3	2	1	3	none	1	2	unsure	3	4	4	80	3	female	1	1	3	4	3	1	2	2	2	bloating or gas	Barretts syndrome	3
284	454	4	6	2		2	3	3	4	3	3	4	2	2	2	4	2	6	3	1	9	D3, B12, folic acid	3	1	none	1	5	5	70	3	male	2	1	1	3	3	2	1	1	1	bloating or gas, diarrhea, heartburn or reflux
286	455	5	1	6		3	2	6	1	3	4	6	2	3	3	5	4	3	2	1	2	none	1	1	none	1	5	5			male	2	1			4		1	1	2	heatburn or reflux
291	456	1	7	5		1	1	7	1	6	1	6	2	3	1	8	3	3	1	1	1	none	1	1	none	1	5	5	55	2	female	1	2	2	2	1	3	1	2	2	bloating or gas	for inflamation and routine	1
292	457	2	6	3		1	1	3	2	6	3	3	1	1	2	3	2	3	3	1	2	none	1	1	none	1	5	5	50	2	female	1	2	2	5	2	3	2	2	2	abdominal pain
303	458	1	1	6		1	1	3	3	6	2	4	1	1	1	7	2	2	1	1	1	none	1	1	none	1	5	5	65	3	female	1	4	1	2	3	3	1	2	2
305	459	2	3	3		1	1	1	1	8	1	4	1	2	1	8	2	3	1	2	5	multivitamin, C, calcium	3	1	none	1	5	5	75	3	female	1	1	3	5	2	2	1	2	2	abdominal pain, diarrhea	above symptoms more frequent since January	2
319	460	1	2	2		1	1	6	2	1	1	2	1	1	3	3	2	2	2	1	1	none	1	1	Shaklee	2	1	1	60	2	male	2	4	2	2	1	1	1	2	2
323	461	3	3	5		5	2	7	1	1	1	1	2	2	1	1	2	1	2	1	1	multivitamin	2	1	none	1	5	5	70	3	male	2	4	3	1	1	1	2	2	2
325	462	2	5	1		3	1	1	1	6	4	5	3	3	1	4	3	2	3	1	2	none	1	3	avtivia	2	1	1	20	1	male	2	1	3	3	0	5	2	1	2	abdominal pain, bloating or gas, constipation, diarrhea	gastro issues and celiac	2
333	463	1	1	1		2	1	3	2	5	1	4	2	2	2	5	2	5	2	1	4	D	3	2	Boulardii	2	4	4			male	2	1	1	5	1	3	1	2	2
337	464	2	2	3		2	1	4	3	3	3	4	2	2	2	4	2	2	2	1	2	none	1	1	none	1	5	5			female	1	2	2	4	3	4	2	2	2	abdominal pain, bloating or gas
343	465	1	1	6		1	1	8	1	9	1	1	1	1	1	7	3	3	1	3	1	none	1	1	none	1	5	5	50	2	male	2	1	1	5	1	3	1	2	2	heartburn or reflux	follow up EGD, colonoscopy screening	1
344	466	3	3	3		4	2	4	4	5	4	4	4	3	4	3	2	4	3	5	2	none	1	1	none	1	5	5	50	2	male	2	2	2	2	2	2	2	2	2
351	467	1	6	5		1	1	2	1	6	1	2	1	3	2	2	2	3	1	1	2	none	1	1	none	1	5	5	70	3	female	1	2	2	1	2	2	1	2	2
352	468	1	6	3		1	1	3	3	6	3	3	3	3	3	3	3	4	1	8	1	none	1	1	none	1	5	5	60	2	female	1	1	3			2	1		2
359	469	3	6	3		1	1	1	1	6	4	4	2	3	6	6	2	3	2	4	1	none	1	1	none	1	5	5
362	470	1	2	5		1	1	5	1	5	4	3	2	2	1	6	1	2	2	1	2	magnesium	3	1	none	1	5	5	70	3	female	1	1	1	4	0	2	1	1	2	constipation, heartburn or reflux
374	471	1	2	5		1	1	6	2	2	1	2	2	2	1	3	3	1	1	7	2	D	3	2	Florastar	2	1	1	45	2	female	1	1	1	5	3	5	1	2	2
376	472	2	2	3		2	1	3	2	4	2	3	2	3	3	6	3	2	2	1	2	none	1	2	unsure	3	1,4	6	50	2	female	1	1	1	3	1	3	1	2	2	abdominal pain, bloating or gas, heartburn or reflux	heartburn	2	2
395	473	1	1	6		1	1	2	2	7	3	4	2	2	1	7	3	2	5	1	1	none	1	1	none	1	5	5	35	1	female	1	1	2	4	4	6	1	2	2	heartburn or reflux
403	474	1	2	6		2	2	4	3	2	4	2	3	2	2	2	3	2	4	1	2	multivitamin, B12, D	3	1	none	1	5	5
419	475	3	3	1		3	2	5	3	4	3	4	3	3	2	4	3	2	3	1	3	multivitamin	2	1	none	1	5	5	45	2	male	2	1	1	4	2	4	1	2	2
435	476	3	5	3		2	2	4	2	5	2	4	3	2	3	4	2	2	3	1	1	none	1	1	none	1	5	5	40	1	male	2	1	3	4	0	4	2	2	1
446	477	1	6	1		2	1	3	2	4	1	1	1	2	1	4	2	3	2	1	1	none	1	1	none	1	5	5			female	1	4		4	1	3	1	2	2
449	478	1	1	6		1	1	1	1	8	1	1	1	1	1	1	1	1	1	1	1	none	1	3	culturelle	2	1	1	70	3	female	1
470	479	2	3	3		1	1	3	3	7	1	3	1	2	2	6	3	6	1	1	3	none	1	1	none	1	5	5	55	2	male	2	4	3	4	2	4	1	1	2	none	regular check up	1	3
474	480	3	3	1		3	1	3	3	4	1	4	1	3	4	4	2	1	1	1	2	none	1	1	none	1	5	5	70	3	male	2	2	2		7	2	2	2	2	none	routine	1
475	481	1	1	6		1	1	3	1	5	3	4	1	2	1	5	3	4	1	1	1	D	3	1	none	1	5	5	65	3	male	2	1		5	2		1	2	2
496	482	5	2	5		2	2	4	2	7	3	6	2	2	3	7	3	3	3	6	2	none	1	1	none	1	5	5	50	2	female	1	1	1	5	1	4	1	2	2
[truncated: 11 more columns]
